# Supplementary material for: Receptor-specific interactome as a hub for rapid cue-induced selective translation in axons
Source: eLife. 2019 Nov 20;8:e48718. doi: 10.7554/eLife.48718 (PMC6894925; doi:10.7554/eLife.48718)
Supplement: Figure 2—source data 1. [file elife-48718-fig2-data1.xlsx]

## Sheet: Figure 2E
Condition	MoC
DCC HnRNP	0.568624
DCC HnRNP	0.655834
DCC HnRNP	0.710414
DCC HnRNP	0.647341
DCC HnRNP	0.615886
DCC HnRNP	0.45432
DCC HnRNP	0.677153
DCC HnRNP	0.702665
DCC HnRNP	0.657807
DCC HnRNP	0.471116
DCC HnRNP	0.632691
DCC HnRNP	0.443569
DCC HnRNP	0.507885
DCC HnRNP	0.346244
DCC HnRNP	0.559505
DCC HnRNP	0.430661
DCC HnRNP	0.555038
DCC HnRNP	0.571028
DCC HnRNP	0.519841
DCC HnRNP	0.745394
DCC HnRNP	0.583759
DCC HnRNP	0.388473
DCC HnRNP	0.699434
DCC HnRNP	0.678272
DCC HnRNP	0.635478
DCC HnRNP	0.599015
DCC HnRNP	0.63269
DCC HnRNP	0.547922
DCC HnRNP	0.614122
DCC HnRNP	0.624276
DCC HnRNP	0.637405
DCC HnRNP	0.711867
DCC HnRNP	0.586976
DCC HnRNP	0.652751
DCC HnRNP	0.394166
DCC HnRNP	0.62062
DCC HnRNP	0.629157
DCC HnRNP	0.689481
DCC HnRNP	0.733019
DCC HnRNP	0.576983
DCC HnRNP	0.63238
DCC HnRNP	0.705372
DCC HnRNP	0.361959
DCC HnRNP	0.714496
DCC HnRNP	0.47708
DCC HnRNP	0.569187
DCC HnRNP	0.682649
DCC HnRNP	0.706777
DCC HnRNP	0.664293
DCC HnRNP	0.715336
DCC HnRNP	0.638471
DCC HnRNP	0.543396
DCC HnRNP	0.526635
DCC HnRNP	0.491499
DCC HnRNP	0.403772
DCC HnRNP	0.610144
DCC HnRNP	0.535159
DCC HnRNP	0.591274
DCC HnRNP	0.55317
DCC HnRNP	0.588926
DCC HnRNP	0.787592
DCC HnRNP	0.341504
DCC HnRNP	0.884746
DCC HnRNP	0.591104
DCC HnRNP	0.555013
DCC HnRNP	0.596623
DCC HnRNP	0.507349
DCC HnRNP	0.473281
DCC HnRNP	0.531325
DCC HnRNP	0.613543
DCC HnRNP	0.48488
DCC HnRNP	0.398502
DCC HnRNP	0.56459
DCC HnRNP	0.603755
DCC HnRNP	0.505515
DCC HnRNP	0.570619
DCC HnRNP	0.503627
DCC HnRNP	0.573214
DCC HnRNP	0.58117
DCC HnRNP	0.561714
DCC HnRNP	0.608126
DCC HnRNP	0.546755
DCC HnRNP	0.383464
DCC HnRNP	0.746404
DCC HnRNP	0.585505
DCC HnRNP	0.583103
DCC HnRNP	0.500967
DCC HnRNP	0.558374
DCC HnRNP	0.504216
DCC HnRNP	0.65001
DCC HnRNP	0.510517
DCC HnRNP	0.451849
DCC HnRNP	0.582255
DCC HnRNP	0.632437
DCC HnRNP	0.649181
DCC HnRNP	0.542258
DCC HnRNP	0.55684
DCC HnRNP	0.569249
DCC HnRNP	0.443363
DCC HnRNP	0.705357
DCC HnRNP	0.625634
DCC HnRNP	0.552364
DCC HnRNP	0.493902
DCC HnRNP	0.482482
DCC HnRNP	0.407168
DCC HnRNP	0.483522
DCC HnRNP	0.37724
DCC HnRNP	0.4554
DCC HnRNP	0.400001
DCC HnRNP	0.633928
DCC HnRNP	0.484793
DCC HnRNP	0.620011
DCC HnRNP	0.516309
DCC HnRNP	0.338744
DCC HnRNP	0.358797
DCC HnRNP	0.526398
DCC HnRNP	0.447646
DCC HnRNP	0.481066
DCC HnRNP	0.504962
DCC HnRNP	0.519244
DCC HnRNP	0.413298
DCC HnRNP	0.358761
DCC HnRNP	0.593536
DCC HnRNP	0.415861
DCC HnRNP	0.570114
DCC HnRNP	0.644273
DCC HnRNP	0.470503
DCC HnRNP	0.468215
DCC HnRNP	0.580676
DCC HnRNP	0.461188
DCC HnRNP	0.545254
DCC HnRNP	0.300458
DCC HnRNP	0.261918
DCC HnRNP	0.588769
DCC HnRNP	0.540424
DCC Staufen	0.668953
DCC Staufen	0.60676
DCC Staufen	0.568771
DCC Staufen	0.509009
DCC Staufen	0.592081
DCC Staufen	0.673975
DCC Staufen	0.363752
DCC Staufen	0.529533
DCC Staufen	0.503116
DCC Staufen	0.640517
DCC Staufen	0.59303
DCC Staufen	0.572112
DCC Staufen	0.584792
DCC Staufen	0.413097
DCC Staufen	0.621598
DCC Staufen	0.557548
DCC Staufen	0.39876
DCC Staufen	0.511251
DCC Staufen	0.570816
DCC Staufen	0.261508
DCC Staufen	0.382207
DCC Staufen	0.539224
DCC Staufen	0.559562
DCC Staufen	0.6559
DCC Staufen	0.617814
DCC Staufen	0.605389
DCC Staufen	0.488132
DCC Staufen	0.624126
DCC Staufen	0.600313
DCC Staufen	0.678517
DCC Staufen	0.507524
DCC Staufen	0.68136
DCC Staufen	0.475716
DCC Staufen	0.424502
DCC Staufen	0.498885
DCC Staufen	0.648931
DCC Staufen	0.653247
DCC Staufen	0.614238
DCC Staufen	0.524169
DCC Staufen	0.658292
DCC Staufen	0.465227
DCC Staufen	0.636321
DCC Staufen	0.329296
DCC Staufen	0.201493
DCC Staufen	0.534877
DCC Staufen	0.501619
DCC Staufen	0.644059
DCC Staufen	0.719387
DCC Staufen	0.428515
DCC Staufen	0.437051
DCC Staufen	0.595612
DCC Staufen	0.389371
DCC Staufen	0.619344
DCC Staufen	0.569463
DCC Staufen	0.501807
DCC Staufen	0.60789
DCC Staufen	0.567892
DCC Staufen	0.501611
DCC Staufen	0.397013
DCC Staufen	0.412855
DCC Staufen	0.501192
DCC Staufen	0.539103
DCC Staufen	0.39221
DCC Staufen	0.491012
DCC Staufen	0.642804
DCC Staufen	0.765531
DCC Staufen	0.634066
DCC Staufen	0.429154
DCC Staufen	0.36947
DCC Staufen	0.499426
DCC Staufen	0.496232
DCC Staufen	0.367361
DCC Staufen	0.645317
DCC Staufen	0.481139
DCC Staufen	0.657627
DCC Staufen	0.465715
DCC Staufen	0.642528
DCC Staufen	0.631939
DCC Staufen	0.643913
DCC Staufen	0.440157
DCC Staufen	0.682299
DCC Staufen	0.436603
DCC Staufen	0.506327
DCC Staufen	0.556385
DCC Staufen	0.614331
DCC Staufen	0.560925
DCC Staufen	0.483705
DCC Staufen	0.741063
DCC Staufen	0.52577
DCC Staufen	0.580936
DCC Staufen	0.17828
DCC Staufen	0.513231
DCC Staufen	0.454809
DCC Staufen	0.384844
DCC Staufen	0.489543
DCC Staufen	0.479518
DCC Staufen	0.217565
DCC Staufen	0.432428
DCC Staufen	0.498297
DCC Staufen	0.557925
DCC Staufen	0.449312
DCC Staufen	0.275055
DCC Staufen	0.504296
DCC Staufen	0.514612
DCC Staufen	0.401192
DCC Staufen	0.54033
DCC Staufen	0.60798
DCC Staufen	0.663692
DCC Staufen	0.717892
DCC Staufen	0.602427
DCC Staufen	0.431731
DCC Staufen	0.25474
DCC Staufen	0.550871
DCC Staufen	0.488587
DCC Staufen	0.472467
DCC Staufen	0.573271
DCC Staufen	0.54458

## Sheet: Figure 2F
Condition	MoC
nrp1 hnRNP	0.433311
nrp1 hnRNP	0.114025
nrp1 hnRNP	0.356875
nrp1 hnRNP	0.277467
nrp1 hnRNP	0.187585
nrp1 hnRNP	0.657779
nrp1 hnRNP	0.340913
nrp1 hnRNP	0.448958
nrp1 hnRNP	0.737053
nrp1 hnRNP	0.428067
nrp1 hnRNP	0.50579
nrp1 hnRNP	0.384674
nrp1 hnRNP	0.289494
nrp1 hnRNP	0.419267
nrp1 hnRNP	0.417378
nrp1 hnRNP	0.415358
nrp1 hnRNP	0.163309
nrp1 hnRNP	0.266098
nrp1 hnRNP	0.213525
nrp1 hnRNP	0.403864
nrp1 hnRNP	0.444855
nrp1 hnRNP	0.365629
nrp1 hnRNP	0.281824
nrp1 hnRNP	0.263339
nrp1 hnRNP	0.202995
nrp1 hnRNP	0.306506
nrp1 hnRNP	0.275431
nrp1 hnRNP	0.33272
nrp1 hnRNP	0.293803
nrp1 hnRNP	0.215893
nrp1 hnRNP	0.153153
nrp1 hnRNP	0.33721
nrp1 hnRNP	0.593211
nrp1 hnRNP	0.537514
nrp1 hnRNP	0.346429
nrp1 hnRNP	0.481987
nrp1 hnRNP	0.515784
nrp1 hnRNP	0.476583
nrp1 hnRNP	0.417096
nrp1 hnRNP	0.390196
nrp1 hnRNP	0.390126
nrp1 hnRNP	0.234794
nrp1 hnRNP	0.320061
nrp1 hnRNP	0.164184
nrp1 hnRNP	0.253278
nrp1 hnRNP	0.255607
nrp1 hnRNP	0.455904
nrp1 hnRNP	0.358451
nrp1 hnRNP	0.286448
nrp1 hnRNP	0.370303
nrp1 hnRNP	0.368802
nrp1 hnRNP	0.228147
nrp1 hnRNP	0.323867
nrp1 hnRNP	0.404814
nrp1 hnRNP	0.438745
nrp1 hnRNP	0.413015
nrp1 hnRNP	0.294476
nrp1 hnRNP	0.27762
nrp1 hnRNP	0.230586
nrp1 hnRNP	0.218275
nrp1 hnRNP	0.138545
nrp1 hnRNP	0.336448
nrp1 hnRNP	0.502597
nrp1 hnRNP	0.474059
nrp1 hnRNP	0.231765
nrp1 hnRNP	0.305389
nrp1 hnRNP	0.436951
nrp1 hnRNP	0.346297
nrp1 hnRNP	0.129892
nrp1 hnRNP	0.538356
nrp1 hnRNP	0.630809
nrp1 hnRNP	0.147779
nrp1 hnRNP	0.207763
nrp1 hnRNP	0.243239
nrp1 hnRNP	0.0925342
nrp1 hnRNP	0.226149
nrp1 hnRNP	0.352212
nrp1 hnRNP	0.260434
nrp1 hnRNP	0.275959
nrp1 hnRNP	0.245092
nrp1 hnRNP	0.231077
nrp1 hnRNP	0.124386
nrp1 hnRNP	0.26774
nrp1 hnRNP	0.330562
nrp1 hnRNP	0.424772
nrp1 hnRNP	0.159443
nrp1 hnRNP	0.269133
nrp1 hnRNP	0.188036
nrp1 hnRNP	0.337764
nrp1 hnRNP	0.50535
nrp1 hnRNP	0.27643
nrp1 hnRNP	0.285426
nrp1 hnRNP	0.372065
nrp1 hnRNP	0
nrp1 hnRNP	0.222184
nrp1 hnRNP	0.176326
nrp1 hnRNP	0.267362
nrp1 hnRNP	0.194734
nrp1 hnRNP	0.242467
nrp1 hnRNP	0.267424
nrp1 hnRNP	0.432243
nrp1 hnRNP	0.373451
nrp1 hnRNP	0.271336
nrp1 hnRNP	0.195154
nrp1 hnRNP	0.143948
nrp1 hnRNP	0.223968
nrp1 hnRNP	0.38529
nrp1 hnRNP	0.327099
nrp1 hnRNP	0.217693
nrp1 hnRNP	0.374709
nrp1 hnRNP	0.109716
nrp1 hnRNP	0.157713
nrp1 hnRNP	0.188792
nrp1 hnRNP	0.145359
nrp1 Staufen	0.644497
nrp1 Staufen	0.603514
nrp1 Staufen	0.498528
nrp1 Staufen	0.474469
nrp1 Staufen	0.364628
nrp1 Staufen	0.475457
nrp1 Staufen	0.346878
nrp1 Staufen	0.351147
nrp1 Staufen	0.444368
nrp1 Staufen	0.490966
nrp1 Staufen	0.299255
nrp1 Staufen	0.239472
nrp1 Staufen	0.530944
nrp1 Staufen	0.522894
nrp1 Staufen	0.462078
nrp1 Staufen	0.652787
nrp1 Staufen	0.260219
nrp1 Staufen	0.586217
nrp1 Staufen	0.269966
nrp1 Staufen	0.443688
nrp1 Staufen	0.288957
nrp1 Staufen	0.370226
nrp1 Staufen	0.494759
nrp1 Staufen	0.413105
nrp1 Staufen	0.383143
nrp1 Staufen	0.358321
nrp1 Staufen	0.262383
nrp1 Staufen	0.381293
nrp1 Staufen	0.607567
nrp1 Staufen	0.450477
nrp1 Staufen	0.432255
nrp1 Staufen	0.388263
nrp1 Staufen	0.220086
nrp1 Staufen	0.183583
nrp1 Staufen	0.359526
nrp1 Staufen	0.319104
nrp1 Staufen	0.503034
nrp1 Staufen	0.566212
nrp1 Staufen	0.241945
nrp1 Staufen	0.359046
nrp1 Staufen	0.426487
nrp1 Staufen	0.616174
nrp1 Staufen	0.317645
nrp1 Staufen	0.388976
nrp1 Staufen	0.256038
nrp1 Staufen	0.384462
nrp1 Staufen	0.370083
nrp1 Staufen	0.0360329
nrp1 Staufen	0.42738
nrp1 Staufen	0.143039
nrp1 Staufen	0.280313
nrp1 Staufen	0.25805
nrp1 Staufen	0.3603
nrp1 Staufen	0.169121
nrp1 Staufen	0.562461
nrp1 Staufen	0.482468
nrp1 Staufen	0.553764
nrp1 Staufen	0.300894
nrp1 Staufen	0.25431
nrp1 Staufen	0.65461
nrp1 Staufen	0.289838
nrp1 Staufen	0.296356
nrp1 Staufen	0.224989
nrp1 Staufen	0.472922
nrp1 Staufen	0.278446
nrp1 Staufen	0.342342
nrp1 Staufen	0.447712
nrp1 Staufen	0.388683
nrp1 Staufen	0.322213
nrp1 Staufen	0.51263
nrp1 Staufen	0.215064
nrp1 Staufen	0.149925
nrp1 Staufen	0.0896402
nrp1 Staufen	0.307926
nrp1 Staufen	0.357586
nrp1 Staufen	0.614369
nrp1 Staufen	0.159742
nrp1 Staufen	0.28711
nrp1 Staufen	0.40815
nrp1 Staufen	0.295872
nrp1 Staufen	0.21291
nrp1 Staufen	0.633946
nrp1 Staufen	0.370246
nrp1 Staufen	0.372732
nrp1 Staufen	0.420934
nrp1 Staufen	0.461231
nrp1 Staufen	0.401917
nrp1 Staufen	0.408444
nrp1 Staufen	0.317306
nrp1 Staufen	0.317971
nrp1 Staufen	0.315496
nrp1 Staufen	0.3812
nrp1 Staufen	0.454567
nrp1 Staufen	0.218217
nrp1 Staufen	0.26569
nrp1 Staufen	0.361283
nrp1 Staufen	0.49911
nrp1 Staufen	0.303335
nrp1 Staufen	0.221143
nrp1 Staufen	0.358793
nrp1 Staufen	0.257703
nrp1 Staufen	0.193943
nrp1 Staufen	0.285289
nrp1 Staufen	0.41251
nrp1 Staufen	0.391035
nrp1 Staufen	0.327618
nrp1 Staufen	0.471124
nrp1 Staufen	0.287518
nrp1 Staufen	0.260716
nrp1 Staufen	0.0758015
nrp1 Staufen	0.376182
nrp1 Staufen	0.476359
nrp1 Staufen	0.374261
nrp1 Staufen	0.27545
