# Supplementary material for: Receptor-specific interactome as a hub for rapid cue-induced selective translation in axons
Source: eLife. 2019 Nov 20;8:e48718. doi: 10.7554/eLife.48718 (PMC6894925; doi:10.7554/eLife.48718)
Supplement: Figure 2—source data 2. [file elife-48718-fig2-data2.xlsx]

## Sheet: DCC
Gene symbol	DCC_average_FPKM	logFC_Nrp1_vs_DCC	FDR_Nrp1_vs_DCC
HNRNPH1	6965.43	-1.63894	1.64e-06
YWHAE	5407.2	-1.25836	5.18e-06
ACTB	3153.57	-2.55695	0.0201349
GAS5	1332.24	-3.37586	0.019671
DCUN1D4	1157.79	-1.86529	1.86e-05
TLK1	1095.12	-1.8622	7.04e-06
SNHG12	961.817	-2.74593	0.0067496
THRAP3	921.525	-1.08483	0.0207674
ZFX	839.361	-2.90156	9.24e-11
CTNNB1	833.456	-2.78844	3.77e-07
SOX11	693.75	-1.04505	0.0100287
FNIP1	689.986	-2.61418	6.11e-09
SLC38A2	616.832	-4.90948	0.000646443
TRA2A	581.764	-1.46814	0.00310514
SNORD14B	459.142	-5.37373	0.0406252
RP11-77H9.5	435.387	-2.6835	0.0176143
UGCG	419.997	-1.83785	0.00493451
GOLIM4	411.51	-3.10436	9.36e-07
ZC3H4	391.271	-1.97046	5.86e-05
BNIP2	370.209	-1.17633	0.0398325
MARCKS	327.743	-1.82672	0.0194653
AC084018.1	310.279	-2.68264	0.00114205
SNORD99	305.028	-3.57694	0.00228503
CNEP1R1	304.342	-2.17932	0.000846956
CARHSP1	254.139	-2.6015	0.00866063
AKAP12	231.827	-2.78881	2.5e-08
LIN54	228.309	-3.69259	9.26e-08
FAM60A	215.131	-1.67516	0.0393879
PDS5B	197.02	-1.12045	0.0387675
BMPR1B	193.203	-1.59132	0.0130488
ITPA	185.632	-2.16186	0.0282194
C9orf37	164.411	-2.49039	0.00256166
OGT	157.867	-1.91787	0.0130025
CTD-2636A23.2	147.215	-2.21751	0.0306531
SPTBN1	146.607	-4.77835	0.00042702
ARPC2	109.203	-1.95722	0.0459125
RSRC1	106.917	-2.6667	0.00745472
SRP14	105.565	-3.54513	0.00458301
SASS6	102.356	-4.234	0.000116793
ARGLU1	101.481	-2.17556	0.0290683
ARID2	96.6284	-2.5158	0.00249114
NDUFA3	96.4895	-4.35112	0.000678932
NAA38	94.4972	-2.26239	0.01041
INO80D	88.1968	-1.71606	0.00904814
HMGCS1	85.1521	-2.23716	0.0207962
AC132872.2	82.0888	-2.26072	0.0246148
DDX55	81.3832	-2.3598	0.0481586
MGA	80.4114	-2.50611	2.9e-05
SRSF2	73.4345	-3.15917	0.0213518
AGO2	68.6209	-2.30681	0.0251419
RBM26	67.7252	-2.44212	0.0119383
MIAT	66.2137	-2.11387	0.0183566
G3BP1	65.8909	-3.65489	0.00485426
PDE4D	65.7512	-2.46677	0.0236134
FANCD2	61.3666	-1.74222	0.0398963
KCNQ2	56.4947	-3.35765	0.029319
PFAS	53.8932	-2.93982	0.0238366
LINC00657	52.5869	-5.06838	0.000242733
KIF21A	52.577	-2.77301	0.0197421
CNN3	51.0187	-1.64881	0.0171445
EPG5	49.4832	-1.78683	0.0230221
DAAM1	44.5029	-2.77794	0.00540399
FTX	43.6063	-2.71301	0.0144815
MRPS15	43.5849	-2.27347	0.0282592
ZNF532	43.5355	-3.14029	0.000739762
UBE2T	42.9203	-3.18244	0.0065056
RN7SL604P	41.3747	-8.63307	0.0306531
DHRS7	41.219	-2.89803	0.0399021
TMEM126B	40.4834	-2.73913	0.0194442
STX10	38.4847	-2.73644	0.0172324
RPL27	36.6558	-3.58181	0.00660903
BRWD1	36.6066	-1.48545	0.0444535
SOD1	36.4655	-2.60381	0.0257497
MEIS3	33.3399	-3.3591	0.025349
RBFA	32.9841	-2.6998	0.0264024
RP11-950C14.3	31.0469	-3.03221	0.0385456
NAV2-AS1	27.5587	-4.68666	0.0348789
PVRL4	26.0933	-2.38069	0.0257516
CLUAP1	24.3034	-3.89209	0.0065056
MAP3K1	23.4753	-2.57381	0.04635
ZNF571-AS1	23.3978	-4.98606	0.01041
PPM1K	23.2192	-2.04213	0.0281618
GYG1	21.89	-4.27464	0.0182389
C2ORF15	21.6382	-3.26485	0.0177561
SMIM4	21.1579	-3.60814	0.00493451
TCF7L2	20.8103	-3.35876	0.0248775
RPS13	20.2984	-5.47985	0.00507819
PMPCA	18.7874	-2.57158	0.0487675
PCNT	18.4907	-2.43088	0.0119043
EIF4E	18.253	-2.30544	0.00536179
TMSB4X	17.7658	-3.84474	0.0454225
DRAM2	17.7199	-3.32473	0.0377529
NAV2	17.2549	-4.2072	0.00851367
HMG20B	16.7135	-3.56957	0.0464194
NUCB1	16.7046	-3.7051	0.0459125
MTERFD2	15.291	-2.71987	0.0487675
KPTN	15.2535	-5.39976	0.000759294
RBM20	14.7825	-3.84288	0.0299381
KIAA1217	14.7542	-2.88996	0.00356576
TXN	14.4645	-4.32058	0.0264322
RREB1	14.2491	-2.62609	0.00519816
MCM9	13.3471	-2.64793	0.035373
PTCD3	13.2702	-4.17282	0.000633957
ZNF780B	13.1506	-2.33143	0.0481191
PACRGL	12.9089	-3.13602	0.0424175
RFC4	12.6711	-3.90334	0.0245455
DIAPH3	12.5216	-2.86182	0.0264322
COQ10B	12.3814	-3.59535	0.00203677
FSD2	12.0743	-2.31535	0.0404844
REV3L-IT1	11.972	-3.33935	0.0274719
NKTR	11.8445	-2.85573	0.0458645
HELZ	10.7449	-2.58145	0.0134464
ZFHX3	10.0159	-2.67253	0.0161564
MRPS6	9.92264	-3.35514	0.0457997
BANP	9.51245	-3.75341	0.0445485
JARID2	9.30207	-3.23788	0.0464437
PSMC6	8.84998	-3.92465	0.0345871
ALMS1	8.47955	-2.86946	0.0161285
RP11-544A12.8	8.39059	-4.94676	0.00536179
AC018462.2	8.33493	-6.11664	0.0399461
ST3GAL5	8.32369	-5.05691	0.0200728
GTSCR1	8.23622	-6.51549	0.0339568
HDAC9	8.14738	-2.86769	0.0474154
TIMM9	7.43645	-4.78396	0.0165292
STK36	6.74066	-4.22527	0.0251419
DTWD1	6.57231	-9.62581	1.61e-05
POLB	6.32633	-5.34089	0.0161285
GLTSCR1L	5.56575	-2.3569	0.0495406
RP11-31F15.2	5.1879	-5.51435	0.0306531
BIRC6	4.88943	-2.69411	0.0406252
HIPK1	4.61681	-3.92957	0.00765272
URB1	4.58961	-2.8205	0.019407
RP11-490G2.2	4.47611	-8.88399	0.00115227
LHFPL2	4.24578	-5.55228	0.0443413
RP11-482D24.2	4.17802	-7.75802	0.0149557
EIF1B	4.17411	-6.46912	0.0191973
FOXN2	4.00674	-3.62273	0.049848
RP5-1057J7.6	3.96143	-3.56601	0.031567
AC005329.7	3.48078	-5.31862	0.0494279
AUTS2	3.37379	-4.31608	0.00823963
PTPRM	3.13777	-9.5676	0.0160044
NARS2	2.7767	-5.41011	0.0481586
HS3ST5	2.75545	-6.40338	0.0177561
C9orf85	2.71071	-5.26338	0.0350696
PLEKHA4	2.56038	-8.96201	0.00836863
TUG1	2.31856	-7.8461	0.0128989
FAM83E	2.27392	-8.44238	0.045891
RP11-3B7.1	2.26279	-7.41768	0.0333713
COPS8	1.98677	-7.68443	0.0283058
RP11-513D5.2	1.96525	-6.50546	0.0177621
HERC6	1.89463	-5.73083	0.0416027
VCAN	1.84885	-9.60023	0.0144815
HPRT1	1.78996	-7.50343	0.0490719
LIMK1	1.43552	-5.82398	0.028336
CKB	1.36275	-7.11566	0.0360376
APOPT1	1.28925	-5.55193	0.0494279
ZNF667-AS1	1.16227	-7.10705	0.0207674
C2orf15	0.055521	-3.26485	0.0177561

## Sheet: Nrp1
Gene symbol	Nrp1_average_FPKM	logFC_Nrp1_vs_DCC	FDR_Nrp1_vs_DCC
RP11-746M1.1	24334.6	2.22619	1.84e-12
PAFAH1B2	8031	3.31274	3.95e-42
USP22	5123.89	2.16624	3.32e-17
ARPC4	4855.67	2.68679	8.43e-15
RP11-294J22.6	4821.38	1.47984	0.00675259
RP11-509E16.1	4540.35	3.15731	2.84e-13
SAR1A	4472.31	2.91814	3.42e-12
SLC35F6	3536.85	3.84012	4.2e-27
snoU109	3417.16	4.82802	1.34e-07
CASP2	3305.31	2.8354	4.21e-14
TMEM33	3033.12	2.97457	1.01e-17
CNP	3032.74	1.9009	1.29e-08
CTD-2369P2.2	3026.73	3.36333	1.63e-07
PPP1CB	2940.89	2.09149	1.31e-12
DDAH1	2803.02	3.11208	2.21e-16
PSMG3	2738.9	1.43339	0.00337432
NUTF2	2608.63	3.85892	1.05e-19
BIRC5	2606.75	2.04347	3.48e-08
FKBP9	2544.59	3.11612	1.07e-14
UBE2G1	2491.04	1.5844	0.000438084
SGPL1	2429.52	3.57764	2.41e-17
NUDT19	2000.04	2.82206	8.32e-10
CHP1	1962.95	2.16891	1.03e-08
SSU72	1929.54	3.55861	2.94e-16
GUCD1	1882.15	1.84227	0.0205084
NF2	1840.99	2.3221	2.22e-09
EIF2S3	1808.89	1.16798	0.0119383
GLTP	1785.51	2.87841	1.37e-12
SRSF6	1715.21	1.13737	0.00336442
SKA2	1707.18	2.55015	1.05e-11
COLGALT1	1685.41	2.70809	7.84e-10
GPI	1667.71	1.68746	3.2e-05
EAF1	1548.43	2.22394	4.94e-08
SLC35F2	1548.35	2.75566	9.18e-12
RP5-1113E3.3	1523.41	2.76384	7.33e-06
TRAPPC2	1517.69	3.02969	2.98e-12
TOR1AIP2	1468.12	1.44156	9.24e-05
SPC24	1446.41	2.26458	0.000154222
UBE2D4	1337.54	3.02938	1.8e-08
ZNF286A	1319.58	2.19689	3.2e-07
CACUL1	1303.23	3.01122	3.32e-17
RP11-650L12.2	1214.75	1.08836	0.0360217
RQCD1	1210.85	1.1956	0.0236637
SEC22B	1133.48	3.23024	2.37e-11
PIP4K2A	1112.48	3.10701	5.76e-09
ZC3HAV1	1103.27	2.25823	6.11e-09
ARRDC3	1075.98	2.72829	8.04e-09
BRD3	1074.65	1.55369	0.000198894
SRPRB	1044.03	3.07617	5.07e-12
RNFT2	1027.96	2.91764	2.93e-10
TMED4	1007.7	2.30633	2.1e-05
EFNA5	959.94	2.06245	4.67e-07
ZNF121	947.569	1.41562	0.0260029
RMND5A	940.489	3.15232	4.63e-12
RNF168	914.721	2.46713	1.29e-08
CBX5	896.021	1.66017	7.48e-06
EIF2S1	894.585	2.78252	2.88e-11
EIF4EBP2	886.894	2.78505	3.42e-12
RP5-1085F17.3	871.929	1.92571	0.000154222
UBA52	800.673	3.10733	7.09e-05
SNX27	743.724	1.95229	4.98e-07
RBBP5	738.914	1.42668	0.00210645
VSIG10	734.58	1.72394	0.00101324
FOXP1	726.186	1.18641	0.0134464
CSNK1A1	716.123	2.22601	0.000154222
C12orf23	712.168	2.51566	2e-07
ELOVL6	684.231	3.20637	8.79e-14
MAPK1IP1L	678.298	2.4071	5.04e-08
DCX	667.211	2.12869	1.42e-07
C1orf134	658.525	3.31886	0.000670692
DNAJC9-AS1	649.773	3.13834	0.000158379
LRRC48	645.919	2.28928	0.00416615
TYMS	636.594	1.81065	0.0106068
RP11-137H2.6	627.02	2.75419	7.29e-07
WDR55	620.908	2.30686	2e-07
RP11-265N6.2	615.62	2.04407	0.0116373
RP5-935K16.1	610.699	2.2617	0.00054386
SLC48A1	597.687	2.96944	1.28e-05
TBC1D24	527.683	1.63069	0.00042642
AP006216.10	507.668	2.07386	0.0234215
KPNA6	500.513	1.01969	0.0251419
TXLNA	496.224	1.92226	0.00124132
XRRA1	487.882	1.44264	0.0073842
SFXN1	482.504	1.9005	2.94e-05
EAF1-AS1	460.017	2.2156	6.92e-05
CTC-510F12.6	454.356	2.22651	0.0149557
RPS20	454.012	3.07199	6.95e-08
MRPS16	447.263	3.12506	1.56e-05
FAM210A	414.068	2.6576	2.68e-06
MRPS17	399.333	2.96352	0.000134328
TLE3	384.594	1.50687	0.00339227
SLC39A9	379.582	2.81544	3.2e-07
PARVB	378.26	3.0003	3.21e-09
DNAJC3	372.805	2.04545	4.97e-05
STON2	369.411	2.72346	5.69e-07
ANKRD40	367.223	1.424	0.00854633
TMEM97	361.263	2.79486	0.0211325
RP11-977G19.12	355.978	2.89184	0.000795536
RP11-565F19.2	352.393	3.89971	5.34e-11
TOX4	344.526	3.15397	6.29e-09
CDC42EP3	338.426	2.04441	0.000641744
NTPCR	337.641	2.14451	6.45e-05
COX7B	333.072	3.65414	1.89e-08
NCS1	331.391	1.46199	0.0216818
BAG4	324.724	1.86553	0.000158788
C17orf58	324.044	1.55082	0.0423389
ARSB	323.142	3.3036	4.82e-11
EXOSC6	321.782	1.42678	0.0198381
DFFA	309.748	2.93927	3.23e-09
AC016747.3	302.831	4.63825	1.07e-13
AGO1	279.261	2.04426	2.51e-06
PAQR7	278.892	2.44464	0.00014596
GSTCD	274.168	1.71554	0.00102001
PIGT	271.399	3.2724	1.06e-05
NARF	270.384	1.61958	0.0207674
SLC25A45	267.248	1.77381	0.00674107
RP4-597N16.4	262.727	1.98626	0.0437378
KIAA1467	262.721	1.95279	0.000133301
SH3BGRL2	258.639	2.50698	8.7e-06
LCLAT1	247.381	1.92798	0.000469065
SYNC	242.174	2.0475	7.52e-05
COX15	232.63	2.80367	0.00168308
METTL7A	228.041	2.96016	0.000142856
C6orf3	227.823	4.12614	0.000238171
RAB33B	227.234	2.89289	3.32e-07
MOB1A	223.179	2.14392	0.0065056
CD47	220.482	2.88851	1.09e-08
TTC39C	218.563	1.37517	0.0414199
DHDDS	213.399	1.66155	0.0106329
RAP2C	211.239	1.2981	0.0256868
C11orf83	208.63	4.57236	2.19e-05
KIAA1715	206.087	1.84268	0.000207351
LBH	199.88	3.20611	1.72e-06
B4GALT1	194.489	3.54773	3.2e-07
RNU1-106P	193.954	3.46612	0.023623
RAB2B	192.218	3.40967	1.53e-07
ZNF252P	190.732	1.48807	0.0119383
C15orf52	190.405	1.49204	0.0454531
ALDH6A1	185.474	3.46098	3.23e-11
SLC30A7	184.082	2.44811	2.51e-06
ENAH	177.696	1.84059	7.8e-05
SRP9	172.58	2.39522	0.00202657
PFKFB2	170.963	1.86312	0.0065056
RAB3D	165.517	2.52099	0.000610528
ACOX1	165.358	2.46759	1.75e-06
ADAM19	163.786	2.69915	1.76e-06
RP5-997D16.2	157.892	3.2749	0.020198
SLC39A11	157.187	3.01551	5.64e-06
RP11-473I1.10	155.653	1.37565	0.0186394
SLC29A4	155.469	2.04394	0.00203677
AAED1	151.666	3.23449	4.13e-06
SDC4	149.073	4.5105	2.16e-09
RHOF	142.934	1.71324	0.0172324
PGAM5	142.07	2.65471	0.0038428
TMEM41B	138.842	1.32151	0.0481586
NUP43	138.626	3.37049	3.59e-06
RPL38	136.801	1.7861	0.0250437
SSR3	136.499	1.68491	0.0208577
PDXK	129.459	1.93709	0.0177561
GEMIN6	128.101	1.513	0.0267011
AMER3	126.817	2.3524	0.000434264
RP11-434H6.7	126.066	2.47688	0.0423212
PTGFRN	125.1	2.00765	0.00393681
RP11-513I15.6	123.689	2.64913	7.04e-06
MPV17L	121.696	3.62363	3.41e-10
RBBP4	121.002	2.16189	1.04e-05
RASSF3	115.987	1.77834	0.0110718
FTSJ2	114.245	2.10781	0.0180644
TMEM120B	106.999	1.74856	0.00499666
VHL	105.861	2.48854	0.0122254
PIGV	105.838	1.94113	0.016301
TMX4	103.083	2.33033	0.0124843
TMTC3	92.9154	1.49261	0.0160044
PINK1-AS	92.7473	2.59097	0.000162662
SSR1	92.6964	2.07439	0.000342468
BID	91.3964	4.07745	7.33e-06
CDKL1	86.3913	2.49603	0.0455993
CPT1A	85.1801	1.68744	0.0177621
ARSG	83.1999	2.39117	0.000794467
SNCA	82.6874	2.29835	0.00567064
SENP2	82.1883	1.71024	0.0333769
RPS15A	80.9282	2.406	0.00216051
SLC30A4	78.9572	1.92472	0.0446605
SOD2	78.3943	2.17712	0.00719316
NRIP3	76.9403	2.92032	0.000103945
DCAF16	76.32	2.16193	0.00256481
ZNF829	71.5672	1.7521	0.0229268
NUDT3	69.0047	2.47751	1.09e-05
RPP30	67.2758	2.24129	0.00343772
MCC	66.4195	1.89184	0.00439843
CALM1	65.4477	2.59993	0.0391959
RNU4-47P	64.2428	6.0512	0.0274719
ETV6	63.763	2.67091	9.3e-05
TRIM35	62.4594	1.68965	0.0236134
PHACTR2	58.0837	2.16616	0.00215305
METTL2B	53.342	2.37585	0.000421967
TP73	51.497	2.69749	0.000151319
PAIP2B	50.3668	2.883	0.000719749
ZNF2	49.4333	1.86132	0.040974
RP11-215P8.3	49.3551	3.4868	0.00365056
JAK3	45.5463	3.20739	7.81e-05
SOAT1	44.9786	3.53007	0.00217748
RRP8	44.7685	2.21316	0.00536179
FOXRED2	44.7027	2.44068	0.0182389
DR1	42.5861	1.82084	0.00669615
APOBEC3C	41.8371	2.38403	0.0122786
JAM2	41.5987	2.30317	0.00439843
ATL3	41.473	3.00517	0.000566358
RP11-3B12.1	41.0085	2.23563	0.020543
POLR3F	39.2512	2.42071	0.00767228
RABGAP1L	38.8921	2.4267	0.00329383
FGD1	36.5453	3.54811	5.14e-07
TXNL1	36.0391	2.22229	0.0238366
DBT	35.3252	1.90116	0.0067496
EIF3M	34.5893	1.73986	0.0384539
TMEM81	34.5838	2.91859	0.0300737
TIMP3	34.0825	2.97408	0.0322849
NCOA4	32.5853	2.27283	0.0210559
HAUS2	31.3278	2.0181	0.0170666
RPL15	31.0892	2.84223	0.00228503
HSPB9	30.4771	6.15415	1.53e-05
GPR157	29.6902	2.92168	0.000359074
C14orf119	29.5328	3.77973	0.0026743
SIAE	29.3249	3.143	0.0106329
MTHFD2	29.0841	1.98996	0.0270692
KIAA0513	27.2532	1.9918	0.0119383
RP4-594I10.3	27.1513	2.83498	0.0115988
LSM12	26.983	2.68827	0.00825407
RP11-621L6.2	26.7218	2.38064	0.0086985
NDUFB5	25.6435	2.64618	0.00767228
TMED8	24.7918	2.34677	0.0195304
FMNL3	24.7631	2.33017	0.0264322
RP11-30K9.6	23.5508	2.46977	0.0371246
MMACHC	23.2964	2.82683	0.0383896
SPAG9	23.1649	1.98554	0.0362355
TRIM69	23.0404	2.56797	0.00849074
RP11-378J18.8	21.7467	3.82424	0.000488914
AC012442.6	21.0026	3.47726	0.0168294
NUDCD2	19.9016	3.1945	0.000445232
IMPDH2	19.4757	3.20313	0.000443699
SLC44A1	18.4124	2.26771	0.0115179
RNF144B	18.3697	3.43843	0.0173292
DCP2	17.4829	3.34538	0.000664537
METTL3	15.688	3.1584	3.36e-06
SSBP2	15.4143	2.04579	0.0256868
MIA3	14.8784	3.79031	3.87e-05
SLC18A2	14.0511	2.73279	0.0194028
APBB2	13.9213	2.26713	0.0110646
BPHL	13.6855	3.31038	0.0232513
RP11-466F5.10	13.5691	9.50905	5.18e-06
JOSD1	13.3581	3.08221	0.0404495
HLCS	12.8826	2.56568	0.0264322
SORT1	12.4205	2.88179	0.0236134
RP11-376P6.3	11.9622	5.42959	0.00758488
RCAN3	11.8665	2.92244	0.00420189
RP6-42F4.1	11.8405	4.13899	0.000646443
CDCA5	11.8236	4.38592	0.00540399
FEN1	11.8115	3.62105	0.00485426
MIER3	11.7345	2.6607	0.0190671
RNF152	11.4031	2.82287	0.00223399
CRIPT	11.061	2.81463	0.0288556
ASB1	10.2701	4.39896	0.00199366
CYB5R3	9.85233	4.20183	0.00206617
CTC-339F2.2	9.73997	5.95951	0.0446605
TFDP2	9.72774	2.88027	0.0173292
DUSP3	9.58458	3.73073	0.0245309
WAC-AS1	8.83098	3.55801	0.0274719
RP11-231G3.1	8.80119	4.90318	0.0369499
FKBP9L	8.77406	4.41243	0.000136052
RP11-4O1.2	8.71644	5.87881	2.93e-06
CTSB	8.06077	3.1873	0.0381082
TNRC18	7.90962	2.39541	0.010839
CTD-2256P15.5	7.71544	4.01692	0.025005
HIST1H2AC	7.33398	4.5919	0.01041
PLTP	7.14778	4.80587	0.0073435
FZD4	7.05814	2.94916	0.0180334
TMEM159	6.78002	2.72709	0.0345871
DPYSL5	6.25695	4.71607	0.000608692
GDAP2	5.98927	3.1011	0.0165292
RP11-305E6.4	5.61755	4.38689	0.0173292
AC004410.3	5.00009	6.79017	0.0067496
TNFAIP8L1	4.91767	3.17029	0.0261716
ATP6V1C2	4.80059	3.3783	0.0163206
RP11-145M9.4	4.77587	3.32723	0.0225564
POP7	4.77382	8.40756	1.36e-05
ABLIM1	4.70949	4.80329	0.00117745
RP11-61A14.3	4.44862	3.4227	0.0293942
CRISPLD2	4.39033	4.31111	0.00040628
PCNXL2	4.37904	2.62189	0.000444853
ZNF132	4.24591	4.6897	0.000678932
IQCK	4.22693	2.921	0.0149557
CASC15	3.9947	4.57073	0.00140386
FBXL20	3.99311	3.6175	0.0249328
FAM86C1	3.80488	4.60213	0.0216818
ING4	3.68487	4.39276	0.0488204
RP11-775D22.3	3.67961	3.97097	0.0260751
RP3-327A19.5	3.66095	5.70009	0.00901712
C8orf33	3.60225	5.51379	0.00157409
PSMF1	3.46299	4.47677	0.00647394
RP11-704J17.5	3.46252	5.99195	0.0430021
CTD-2514K5.2	3.39092	1.8503	0.0172324
AL022344.4	3.32326	6.92353	0.00507819
TBRG4	3.26941	4.1048	0.0471772
CBX1	3.13165	8.04341	0.000124521
GPRC5A	3.10523	3.9883	0.0184701
CTD-2196E14.4	3.08827	6.0898	0.0270848
TMEM192	3.03905	3.37638	0.0133081
ENOSF1	2.85595	1.7305	0.0479736
C3orf67	2.79763	9.13148	0.000162662
MRS2	2.78627	4.59398	0.00439843
NNT-AS1	2.75724	2.66765	0.0481831
CTD-2192J16.20	2.55162	4.60373	0.0312061
RP11-466F5.6	2.54769	8.61831	9.22e-05
AGPAT4	2.49147	7.81799	0.00256481
PIK3R1	2.42775	6.49237	0.00851367
RP5-901A4.1	2.42262	5.26456	0.0126299
CASC14	2.38324	3.97037	0.00139558
LCN15	2.25836	7.36124	0.00187951
SFT2D2	2.21597	2.9427	0.0439017
RNF144A-AS1	2.21159	7.59956	0.0161285
RP11-66B24.4	2.2063	6.01979	0.0190671
PPIL6	2.20605	5.15206	0.000590556
GNG7	2.19738	3.58634	0.0251419
TMEM9	2.19551	6.03424	0.0495406
TMEM222	2.13165	7.87268	0.0247099
SWSAP1	2.11151	4.17229	0.0330148
TAGLN	2.08614	8.19343	0.0065056
SLC35F1	2.00469	9.51313	8.02e-08
EPX	1.94614	3.30358	0.0479192
GPX1	1.88446	6.97135	0.0404495
GTF2F1	1.87932	4.39078	0.0306531
CSNK1G1	1.86372	3.12712	0.0404495
CATSPER3	1.83726	6.88725	0.01041
TBC1D9B	1.82546	4.24634	0.00310514
TECR	1.81906	7.14049	0.00758488
RAPGEF1	1.73425	6.05456	0.00077259
INPP5F	1.71172	3.31482	0.00203677
PROCA1	1.65215	5.7099	0.00948892
PDE7A	1.6339	6.94527	0.00124603
FITM2	1.59425	5.82142	0.0073842
PINK1	1.58847	2.68793	0.00040628
RP11-334E6.12	1.57972	7.26156	0.00779879
TUBB6	1.55842	5.55734	0.00611011
AFG3L2	1.55586	3.82861	0.0261184
RABL5	1.54082	5.95659	0.0133198
SZRD1	1.46127	6.85765	0.00238211
CTD-2659N19.10	1.45333	5.92257	0.0290206
RP11-752G15.9	1.45261	7.66967	0.00835013
SELRC1	1.38587	7.3744	0.0295472
RFTN1	1.38504	8.15448	0.0124106
MXD4	1.31886	6.81216	0.00199366
DIRAS3	1.30712	7.10919	0.0459974
CACFD1	1.29849	8.15266	0.00945452
RNASEH2C	1.29445	7.96352	0.0260751
ATRIP	1.27319	7.54611	0.00570165
LYN	1.25751	7.47346	0.0104321
DTD1	1.24746	7.96332	0.012675
PGPEP1	1.22867	3.61617	0.0381082
RP3-476K8.3	1.21572	6.07269	0.0204976
MAP2K5	1.20805	7.3717	0.00866684
ESRRG	1.2016	5.27637	0.0290683
FUT1	1.18494	8.52233	0.000308398
TMEM107	1.18038	7.11193	0.0360217
RP11-303E16.7	1.17622	6.38924	0.010839
THY1	1.16467	8.62433	0.000488914
FBXO17	1.15834	4.62584	0.0326293
IFRD2	1.14947	7.30407	0.0310416
ID3	1.14474	6.4009	0.0322849
ACTR1A	1.13067	8.00725	0.000405636
YRDC	1.11195	7.84261	0.00217748
TMED1	1.11	6.64625	0.0423389
ZNF880	1.10777	5.59067	0.0401442
LYPLA2	1.09711	6.8216	0.030346
SEMA5A	1.08224	3.36286	0.0270692
C1orf122	1.07709	7.25682	0.0129732
CRKL	1.06939	5.29069	0.0236134
CHMP6	1.03542	7.19739	0.0207674
C6orf89	1.01466	5.23572	0.0300737
PNMAL1	1.00393	8.07898	0.00560982
TMEM98	1.00245	7.04034	0.0261953
WIPI1	0.0547617	2.31826	0.0072856
ATG12	0	3.91181	1.26e-20
FAM117B	0	3.52289	8.83e-11

## Sheet: DCC_GO
Category	Term	Count	%	p value	Genes	List Total	Pop Hits	Pop Total	Fold Enrichment	Bonferroni	Benjamini	FDR
GOTERM_CC_DIRECT	GO:0005925~focal adhesion	6	16.6667	0.000405798	ACTB, ARPC2, AKAP12, MARCKS, YWHAE, CTNNB1	31	391	18224	9.02104	0.0424996	0.0424996	0.455195
GOTERM_MF_DIRECT	GO:0005515~protein binding	24	66.6667	0.00501213	ACTB, ARGLU1, SRP14, CARHSP1, PDS5B, SLC38A2, AKAP12, FAM60A, YWHAE, FNIP1, CTNNB1, SASS6, BNIP2, ARPC2, RSRC1, THRAP3, SPTBN1, CNEP1R1, TLK1, LIN54, OGT, BMPR1B, HNRNPH1, DCUN1D4	31	8785	16881	1.48767	0.421719	0.421719	5.50989
GOTERM_BP_DIRECT	GO:0045669~positive regulation of osteoblast differentiation	3	8.33333	0.00512118	SOX11, BMPR1B, CTNNB1	31	60	16792	27.0839	0.844912	0.844912	6.81672
GOTERM_CC_DIRECT	GO:0070688~MLL5-L complex	2	5.55556	0.0130963	ACTB, OGT	31	8	18224	146.968	0.755994	0.506031	13.7727
GOTERM_MF_DIRECT	GO:0044822~poly(A) RNA binding	7	19.4444	0.0131036	SRP14, ZC3H4, THRAP3, TRA2A, SPTBN1, HNRNPH1, YWHAE	31	1129	16881	3.3763	0.762533	0.512694	13.8237
GOTERM_MF_DIRECT	GO:0098641~cadherin binding involved in cell-cell adhesion	4	11.1111	0.0144623	ARGLU1, SPTBN1, YWHAE, CTNNB1	31	290	16881	7.51101	0.795646	0.410983	15.1525
GOTERM_CC_DIRECT	GO:0005913~cell-cell adherens junction	4	11.1111	0.0157226	ARGLU1, SPTBN1, YWHAE, CTNNB1	31	323	18224	7.28014	0.816525	0.431768	16.3171
GOTERM_MF_DIRECT	GO:0005200~structural constituent of cytoskeleton	3	8.33333	0.0162519	ACTB, ARPC2, SPTBN1	31	110	16881	14.8513	0.832372	0.360138	16.8742
GOTERM_CC_DIRECT	GO:0005938~cell cortex	3	8.33333	0.0173748	AKAP12, MARCKS, CTNNB1	31	123	18224	14.3383	0.846712	0.374285	17.8825
GOTERM_BP_DIRECT	GO:0002089~lens morphogenesis in camera-type eye	2	5.55556	0.0212363	SOX11, CTNNB1	31	12	16792	90.2796	0.999587	0.979675	25.559
GOTERM_BP_DIRECT	GO:0051571~positive regulation of histone H3-K4 methylation	2	5.55556	0.0299554	OGT, CTNNB1	31	17	16792	63.7268	0.999984	0.974777	34.1776
GOTERM_CC_DIRECT	GO:0005829~cytosol	11	30.5556	0.0343895	ACTB, SRP14, CARHSP1, ITPA, PDS5B, BNIP2, ARPC2, SPTBN1, OGT, YWHAE, CTNNB1	31	3315	18224	1.9507	0.976351	0.527107	32.5215
GOTERM_BP_DIRECT	GO:0051149~positive regulation of muscle cell differentiation	2	5.55556	0.0420363	BNIP2, CTNNB1	31	24	16792	45.1398	1	0.979703	44.5971
GOTERM_MF_DIRECT	GO:0051219~phosphoprotein binding	2	5.55556	0.0587401	THRAP3, YWHAE	31	34	16881	32.0323	0.998637	0.73278	49.4799
GOTERM_BP_DIRECT	GO:0000398~mRNA splicing, via spliceosome	3	8.33333	0.0594183	RSRC1, TRA2A, HNRNPH1	31	222	16792	7.31997	1	0.988289	56.9297
GOTERM_BP_DIRECT	GO:0006605~protein targeting	2	5.55556	0.067436	AKAP12, YWHAE	31	39	16792	27.7783	1	0.985359	61.7128
GOTERM_BP_DIRECT	GO:0030521~androgen receptor signaling pathway	2	5.55556	0.070773	THRAP3, CTNNB1	31	41	16792	26.4233	1	0.977773	63.5544
GOTERM_MF_DIRECT	GO:0003713~transcription coactivator activity	3	8.33333	0.0714625	THRAP3, ZFX, CTNNB1	31	248	16881	6.58728	0.999691	0.73997	56.6686
GOTERM_MF_DIRECT	GO:0046332~SMAD binding	2	5.55556	0.0737218	BMPR1B, CTNNB1	31	43	16881	25.3278	0.999763	0.696529	57.843
GOTERM_CC_DIRECT	GO:0005654~nucleoplasm	9	25	0.0759924	ACTB, ARGLU1, PDS5B, THRAP3, GOLIM4, LIN54, OGT, HNRNPH1, CTNNB1	31	2784	18224	1.90044	0.999788	0.755724	58.8687
GOTERM_CC_DIRECT	GO:0005634~nucleus	14	38.8889	0.0789096	ARGLU1, SRP14, PDS5B, SOX11, ZFX, TRA2A, CTNNB1, RSRC1, THRAP3, SPTBN1, TLK1, OGT, HNRNPH1, DCUN1D4	31	5415	18224	1.51989	0.999849	0.715335	60.305
GOTERM_CC_DIRECT	GO:0070062~extracellular exosome	9	25	0.0795532	ACTB, SRP14, CARHSP1, ARPC2, THRAP3, SPTBN1, MARCKS, YWHAE, CTNNB1	31	2811	18224	1.88219	0.999859	0.670024	60.6157
GOTERM_BP_DIRECT	GO:0021762~substantia nigra development	2	5.55556	0.0840061	ACTB, YWHAE	31	49	16792	22.1093	1	0.981342	70.0782
GOTERM_BP_DIRECT	GO:0098609~cell-cell adhesion	3	8.33333	0.0840276	ARGLU1, SPTBN1, YWHAE	31	271	16792	5.99643	1	0.970987	70.0878
GOTERM_BP_DIRECT	GO:0045944~positive regulation of transcription from RNA polymerase II promoter	5	13.8889	0.0950914	SOX11, THRAP3, OGT, BMPR1B, CTNNB1	31	981	16792	2.76084	1	0.973408	74.691
GOTERM_BP_DIRECT	GO:0021987~cerebral cortex development	2	5.55556	0.0954355	SLC38A2, YWHAE	31	56	16792	19.3456	1	0.963482	74.823

## Sheet: Nrp1_GO
Category	Term	Count	%	p value	Genes	List Total	Pop Hits	Pop Total	Fold Enrichment	Bonferroni	Benjamini	FDR
GOTERM_CC_DIRECT	GO:0005829~cytosol	43	30.0699	7.28398e-05	ENAH, MOB1A, PFKFB2, SYNC, NCS1, ARPC4, RPL38, SPC24, TYMS, BAG4, AGO1, SKA2, PAFAH1B2, RPS20, DCX, GEMIN6, DNAJC3, CASP2, CDC42EP3, DDAH1, RHOF, CSNK1A1, RAP2C, PDXK, EXOSC6, VHL, DFFA, SNX27, CHP1, EIF2S3, BIRC5, PPP1CB, GLTP, GPI, EIF2S1, KPNA6, NUTF2, PIP4K2A, NUP43, UBA52, PARVB, SRP9, TRAPPC2	131	3315	18224	1.8045	0.0157542	0.0157542	0.0925449
GOTERM_CC_DIRECT	GO:0070062~extracellular exosome	38	26.5734	0.000106654	ARSB, MOB1A, RAB3D, UBE2G1, NCS1, GSTCD, CNP, ARPC4, SDC4, CD47, TMED4, TMEM33, RPS20, PAFAH1B2, SLC35F6, DNAJC3, SAR1A, RHOF, DDAH1, SLC30A7, B4GALT1, RAB2B, ALDH6A1, RAP2C, PDXK, NTPCR, EIF2S3, CHP1, METTL7A, PPP1CB, GLTP, RAB33B, GPI, EIF2S1, SH3BGRL2, NUTF2, UBA52, SRP9	131	2811	18224	1.88059	0.0229837	0.0115586	0.13548
GOTERM_BP_DIRECT	GO:0006614~SRP-dependent cotranslational protein targeting to membrane	6	4.1958	0.000611048	SRPRB, RPL38, RPS20, UBA52, SRP9, SSR3	123	94	16792	8.71406	0.364234	0.364234	0.924501
GOTERM_CC_DIRECT	GO:0005789~endoplasmic reticulum membrane	15	10.4895	0.00340123	TOR1AIP2, FKBP9, RAB2B, SGPL1, DHDDS, PIGV, PIGT, SRPRB, TMED4, TMEM33, LCLAT1, SEC22B, PTGFRN, ELOVL6, SSR3	131	862	18224	2.42079	0.524188	0.21931	4.23814
GOTERM_CC_DIRECT	GO:0016020~membrane	27	18.8811	0.00635542	STON2, ACOX1, SLC39A11, CNP, SFXN1, TXLNA, COLGALT1, SEC22B, RPS20, DNAJC3, CASP2, SLC30A7, CSNK1A1, B4GALT1, RAP2C, NF2, VHL, NTPCR, PIGT, SRPRB, METTL7A, GLTP, GPI, EIF2S1, LCLAT1, KPNA6, EFNA5	131	2200	18224	1.70731	0.750901	0.293531	7.78428
GOTERM_CC_DIRECT	GO:0005840~ribosome	6	4.1958	0.00677872	MRPS17, MRPS16, EIF2S1, RPL38, RPS20, UBA52	131	166	18224	5.02824	0.772997	0.256628	8.28237
GOTERM_BP_DIRECT	GO:0007264~small GTPase mediated signal transduction	7	4.8951	0.00917258	RAB2B, RAP2C, RAB3D, CHP1, SRPRB, RHOF, RAB33B	123	246	16792	3.88472	0.998917	0.967095	13.0664
GOTERM_BP_DIRECT	GO:0006412~translation	7	4.8951	0.01044	MRPS17, MRPS16, EIF4EBP2, RPL38, SLC25A45, RPS20, UBA52	123	253	16792	3.77724	0.999581	0.925148	14.7409
GOTERM_MF_DIRECT	GO:0003743~translation initiation factor activity	4	2.7972	0.0106662	EIF4EBP2, EIF2S1, AGO1, EIF2S3	127	61	16881	8.71615	0.925361	0.925361	12.942
GOTERM_CC_DIRECT	GO:0005783~endoplasmic reticulum	13	9.09091	0.0153416	TOR1AIP2, SGPL1, FKBP9, DHDDS, VHL, TMX4, CHP1, METTL7A, TMEM33, ELOVL6, DNAJC3, SAR1A, TRAPPC2	131	828	18224	2.18416	0.965624	0.429779	17.841
GOTERM_BP_DIRECT	GO:0006413~translational initiation	5	3.4965	0.017772	EIF2S1, EIF2S3, RPL38, RPS20, UBA52	123	137	16792	4.98249	0.999998	0.963914	23.8513
GOTERM_CC_DIRECT	GO:0000777~condensed chromosome kinetochore	4	2.7972	0.0243506	CSNK1A1, SPC24, BIRC5, NUP43	131	87	18224	6.39607	0.995365	0.535936	26.9001
GOTERM_MF_DIRECT	GO:0005525~GTP binding	8	5.59441	0.0251465	RAB2B, RAP2C, RAB3D, EIF2S3, SRPRB, SAR1A, RHOF, RAB33B	127	384	16881	2.76919	0.997895	0.954116	28.0474
GOTERM_MF_DIRECT	GO:0003735~structural constituent of ribosome	6	4.1958	0.0255211	MRPS17, MRPS16, RPL38, SLC25A45, RPS20, UBA52	127	222	16881	3.59247	0.998082	0.875746	28.4038
GOTERM_CC_DIRECT	GO:0005739~mitochondrion	17	11.8881	0.0275381	ARSB, ALDH6A1, ACOX1, MRPS16, NUDT19, RAB3D, VHL, COX7B, SFXN1, FAM210A, TYMS, PGAM5, MPV17L, SLC35F6, DDAH1, CASP2, COX15	131	1331	18224	1.77682	0.997729	0.532773	29.8783
GOTERM_CC_DIRECT	GO:0005785~signal recognition particle receptor complex	2	1.3986	0.0282322	SRPRB, SRP9	131	4	18224	69.5573	0.998056	0.500269	30.5119
GOTERM_MF_DIRECT	GO:0070053~thrombospondin receptor activity	2	1.3986	0.029526	CD47, SDC4	127	4	16881	66.4606	0.999292	0.836873	32.115
GOTERM_BP_DIRECT	GO:0070534~protein K63-linked ubiquitination	3	2.0979	0.0295486	UBE2D4, UBE2G1, RNF168	123	37	16792	11.0692	1	0.988264	36.6042
GOTERM_MF_DIRECT	GO:0005047~signal recognition particle binding	2	1.3986	0.0367714	SRPRB, SRP9	127	5	16881	53.1685	0.999885	0.836882	38.3815
GOTERM_BP_DIRECT	GO:0051496~positive regulation of stress fiber assembly	3	2.0979	0.0373174	BAG4, NF2, SDC4	123	42	16792	9.75145	1	0.990876	43.8929
GOTERM_MF_DIRECT	GO:0005515~protein binding	77	53.8462	0.0373498	ENAH, ZC3HAV1, NCS1, GUCD1, TXLNA, SDC4, CBX5, CD47, BAG4, EIF4EBP2, RMND5A, ELOVL6, CASP2, SAR1A, SGPL1, RBBP5, RBBP4, DFFA, TLE3, PIGT, CHP1, EIF2S3, MAPK1IP1L, ARRDC3, TOX4, PPP1CB, GLTP, EIF2S1, LCLAT1, KPNA6, PTGFRN, USP22, NUP43, UBA52, PARVB, SRP9, SSU72, TRAPPC2, STON2, MRPS16, MOB1A, CACUL1, PFKFB2, GSTCD, ARPC4, SPC24, AMER3, UBE2D4, SLC48A1, TMEM33, AGO1, SEC22B, RNF168, SKA2, RPS20, P…	127	8785	16881	1.16505	0.9999	0.784608	38.8581
GOTERM_CC_DIRECT	GO:0030176~integral component of endoplasmic reticulum membrane	4	2.7972	0.0383726	SGPL1, TMEM33, PIGT, ELOVL6	131	104	18224	5.35056	0.999803	0.573863	39.1858
GOTERM_CC_DIRECT	GO:0005743~mitochondrial inner membrane	8	5.59441	0.0388137	MRPS17, TYMS, MRPS16, COX7B, CNP, SFXN1, SLC25A45, COX15	131	441	18224	2.52362	0.999821	0.543672	39.5394
GOTERM_BP_DIRECT	GO:0007062~sister chromatid cohesion	4	2.7972	0.0391702	SPC24, SKA2, BIRC5, NUP43	123	103	16792	5.30176	1	0.985445	45.5115
GOTERM_BP_DIRECT	GO:0019083~viral transcription	4	2.7972	0.0481974	RPL38, RPS20, NUP43, UBA52	123	112	16792	4.87573	1	0.989698	52.7927
GOTERM_CC_DIRECT	GO:0072357~PTW/PP1 phosphatase complex	2	1.3986	0.048886	TOX4, PPP1CB	131	7	18224	39.747	0.999982	0.597692	47.1164
GOTERM_BP_DIRECT	GO:1901029~negative regulation of mitochondrial outer membrane permeabilization involved in apoptotic signaling pathway	2	1.3986	0.0497711	MPV17L, SLC35F6	123	7	16792	39.0058	1	0.985054	53.9649
GOTERM_CC_DIRECT	GO:0005881~cytoplasmic microtubule	3	2.0979	0.0513132	RAB3D, BIRC5, SRPRB	131	51	18224	8.18321	0.99999	0.586602	48.8064
GOTERM_CC_DIRECT	GO:0005654~nucleoplasm	28	19.5804	0.0563221	ACOX1, CNP, CBX5, TYMS, AGO1, RNF168, RPS20, GEMIN6, ALDH6A1, RBBP5, PDXK, RBBP4, EXOSC6, SNX27, DFFA, VHL, TLE3, BIRC5, TOX4, PPP1CB, FOXP1, GPI, EAF1, SRSF6, SH3BGRL2, KPNA6, NUTF2, UBA52	131	2784	18224	1.39914	0.999997	0.594519	52.1377
GOTERM_BP_DIRECT	GO:0006364~rRNA processing	5	3.4965	0.0707779	WDR55, EXOSC6, RPL38, RPS20, UBA52	123	214	16792	3.18973	1	0.995658	67.2237
GOTERM_MF_DIRECT	GO:0046873~metal ion transmembrane transporter activity	2	1.3986	0.0791302	SLC39A11, SLC39A9	127	11	16881	24.1675	1	0.942153	65.5427
GOTERM_CC_DIRECT	GO:0005737~cytoplasm	46	32.1678	0.080841	STON2, MRPS16, ENAH, SLC39A11, ZC3HAV1, UBE2G1, NCS1, GSTCD, CNP, TXLNA, TYMS, EIF4EBP2, LBH, WDR55, RMND5A, MPV17L, AGO1, RNF168, PAFAH1B2, RPS20, DCX, GEMIN6, DNAJC3, CASP2, CDC42EP3, SLC30A7, RAP2C, PDXK, NF2, DFFA, SNX27, EIF2S3, CHP1, BIRC5, SRPRB, METTL7A, XRRA1, GLTP, RASSF3, TBC1D24, GPI, EIF2S1, SH3BGRL2, KPNA6, SSU72, TRAPPC2	131	5222	18224	1.22544	1	0.706273	65.7493
GOTERM_CC_DIRECT	GO:0005793~endoplasmic reticulum-Golgi intermediate compartment	3	2.0979	0.0848664	SEC22B, CHP1, TRAPPC2	131	68	18224	6.1374	1	0.701306	67.6077
GOTERM_CC_DIRECT	GO:0005730~nucleolus	11	7.69231	0.0861385	SPC24, STON2, TYMS, ACOX1, RBBP5, WDR55, NF2, EXOSC6, PAFAH1B2, PPP1CB, CBX5	131	857	18224	1.7856	1	0.684973	68.1754
GOTERM_CC_DIRECT	GO:0005794~Golgi apparatus	11	7.69231	0.0892128	B4GALT1, ARSB, SLC39A11, ZC3HAV1, NCS1, ADAM19, PTGFRN, SAR1A, RAB33B, SLC30A7, TRAPPC2	131	863	18224	1.77319	1	0.677527	69.5097
GOTERM_BP_DIRECT	GO:0033540~fatty acid beta-oxidation using acyl-CoA oxidase	2	1.3986	0.0904711	ACOX1, NUDT19	123	13	16792	21.0031	1	0.998318	76.3301
GOTERM_CC_DIRECT	GO:0030175~filopodium	3	2.0979	0.0913327	B4GALT1, ENAH, NF2	131	71	18224	5.87808	1	0.666765	70.3996
GOTERM_CC_DIRECT	GO:0005847~mRNA cleavage and polyadenylation specificity factor complex	2	1.3986	0.0953997	CSNK1A1, SSU72	131	14	18224	19.8735	1	0.664743	72.0401
GOTERM_CC_DIRECT	GO:0005746~mitochondrial respiratory chain	2	1.3986	0.0953997	COX7B, COX15	131	14	18224	19.8735	1	0.664743	72.0401
