# Supplementary material for: Receptor-specific interactome as a hub for rapid cue-induced selective translation in axons
Source: eLife. 2019 Nov 20;8:e48718. doi: 10.7554/eLife.48718 (PMC6894925; doi:10.7554/eLife.48718)
Supplement: Figure 3—figure supplement 1—source data 1. [file elife-48718-fig3-figsupp1-data1.xlsx]

## Sheet: Figure 3 - Figure Supplement 1A
Control	Netrin-1 2 min 60ng/ml
0.364563	0.355691
0.279436	0.405007
0.297444	0.537315
0.405566	0.41956
0.485908	0.407602
0.325717	0.364367
0.50951	0.437119
0.349317	0.425562
0.430224	0.382383
0.344468	0.378465
0.37089	0.427701
0.329864	0.415822
0.366841	0.363566
0.38438	0.321293
0.393212	0.384466
0.341282	0.340621
0.321743	0.454715
0.437224	0.444304
0.364382	0.343384
0.408079	0.554205
0.32782	0.393719
0.351541	0.343179
0.305273	0.210715
0.410138	0.337752
0.37283	0.357398
0.422114	0.431102
0.462947	0.390621
0.449811	0.325135
0.433888	0.466063
0.481292	0.404534
0.439116	0.394834
0.448683	0.365111
0.433348	0.385609
0.393455	0.356879
0.449349	0.327619
0.521987	0.410908
0.546248	0.466154
0.342459	0.32101
0.540754	0.51406
0.672895	0.62387
0.328586	0.359476
0.529292	0.420698
0.671443	0.425983
0.539499	0.386367
0.53863
0.492521
0.558984
0.635105
0.480682
0.529903
0.49317
0.451941
0.691335
0.490163
0.465424
0.623536
0.485202
0.430887
0.514768
0.388036
0.418703
0.387508
0.219513
0.575683
0.135212
0.328381
0.353503
0.456709
0.424061
0.381195
0.34829
0.4231
0.401188

## Sheet: Figure 3 - Figure Supplement 1F
Control	Netrin-1
0.480736	2.30992
1.6938	0.773232
1.31732	1.05089
1.62031	1.07804
1.48673	0.539742
0.788074	1.35859
0.369964	1.52438
1.31551	0.39277
0.915498	0.786264
0.47784	1.18555
1.31478	1.03894
1.0031	1.54719
0.302994	0.91948
1.22175	2.13906
2.01634	0.363086
2.57672	0.987536
0.878574	1.35388
0.851786	0.535036
1.30248	0.916584
1.65977	1.51388
0.500284	2.22992
0.359104	0.9593
0.816672	0.469152
0.50318	0.628432
0.757666	0.625536
0.759838	0.444174
0.466256	0.604902
0.275482	1.57108
0.959242	0.404504
1.25253	0.216033
0.765919	0.671198
0.391306	1.00136
0.899653	1.15606
1.40373	0.760484
0.797557	1.43731
0.729234	6.50623
1.01243	0.442742
1.07124	0.988551
1.35657	1.28766
0.292315	0.536298
0.27931	4.40568
1.9245	1.2535
0.68789	1.47885
1.13432	1.9082
2.16732	2.90801
0.902953	4.17761
1.08696	1.45633
0.429737	1.06774
1.1384	1.92974
0.173719	1.05202
1.04484	0.781447
1.19721	0.504466
1.908	0.286686
2.02796	0.920616
0.390988	2.89228
0.783553	6.09979
2.55743	0.436919
2.3188	5.77253
0.568265	0.439442
1.70937	0.594334
5.27605	0.324535
1.08196	0.104038
0.465116	1.36064
0.211818	1.24632
1.31996	0.172943
0.39982	2.55979
1.00483	4.45964
0.332158	1.51437
0.375531	0.178184
0.875031	0.393985
0.846799	0.475683
1.32784	0.30093
0.45376	0.937961
0.802952	0.191314
0.408968	0.0550443
0.0678196	0.929917
0.439881	0.767308
0.663528	0.572681
0.740969	0.209768
0.386729	0.178539
0.167025	1.08007
1.93412	1.31412
0.238	1.5078
1.60386	1.13621
1.53808	0.384521
1.74391	0.139109
0.206455	0.551862
0.443824	0.678669
1.43446	0.711002
0.840805	0.674253
0.784815	0.373323
0.22759	0.203932
	2.30571
	0.362125
	3.55296
	0.43925
	0.268913
	0.74917
	0.890014
	0.524577
	1.48067
	0.19715
	0.158351
	0.458807
	0.677092
	0.273171
	0.128069
	1.59013
	0.324746
	0.367645
	0.936857
	1.15514
	0.429787
	0.492086
	0.864463
	0.353135
	0.355659
	0.24352
	1.82419
	1.23747
	0.44272
	0.915091
	0.457073
	0.24762
	1.87829
	0.231375
	0.143052
	0.948686
	0.282319
	0.792701
	0.201882
	0.482939
	1.02439
	0.183586
	0.565899

## Sheet: Figure 3 - Figure Supplement 1G
Control	Sema3A 700 ng/ml
0.665508	1.3144
0.572632	0.798312
0.627502	0.569966
0.547026	1.32829
0.402194	0.539648
0.463946	0.584536
0.72974	1.51906
0.495132	1.73879
2.08717	0.295626
1.04582	1.391
1.0814	1.40348
1.37014	0.788742
1.1723	0.523
1.83309	0.89986
1.36437	0.591766
1.64343	0.974607
0.483042	1.58865
1.96621	1.80793
0.433938	0.844242
0.932161	0.651534
0.830154	0.953332
0.581421	1.89722
0.722013	2.41128
2.00392	0.916031
1.12326	1.83516
0.347043	0.739255
0.502947	1.43377
1.42837	1.66111
1.26407	2.34283
1.42506	1.00823
1.0159	1.0908
0.8429	1.1221
0.972791	1.4943
1.05961	0.430826
0.995213	1.07406
0.707248	0.584468
0.684543	0.863799
1.00533	0.823731
0.589238	1.21964
0.736583	0.639275
0.667132	1.40768
0.68626	0.840951
1.10311	2.05205
0.39777	0.85984
0.425866	1.11197
0.926859	1.85938
0.696992	0.164635
0.506431	0.812237
0.847486	1.02539
2.20665	0.640804
1.11432	0.809086
0.764774	1.2567
0.695514	1.07612
0.714069	0.66367
0.782423	0.792956
0.990586	1.14515
1.71486	0.774045
1.11647	0.656996
2.26737	0.614601
1.86769	1.08212
1.19603	1.22216
1.41898	0.975266
1.04282	1.03045
0.982	1.26406
1.33851	1.00734
1.56103	1.27055
1.05717	0.573442
0.838471	1.13403
0.667466	0.792152
0.523651	0.603662
1.10149	0.901786
1.19703
0.966211
0.585327
1.41941
1.05269
0.838948
1.24282
0.646335
0.965501
1.27778
0.616455
0.60082
0.811619
0.717683
0.457382
0.220811
0.810692
0.74951
0.811249
0.600325
1.71211
1.23322
0.681654
0.793018
0.786529
0.80581
0.97162
0.841654
0.677019
0.995165
0.476602
0.656316
0.692469
0.473388
0.330506
0.697537
0.971867
1.00975
0.995722
0.877066
0.627146
0.60737
1.11833
0.704149
1.21258
0.786776
0.546683
0.854385
0.94381
1.24471
2.17616
2.25378
1.47739
1.26826
1.97315
0.755938
0.901291
0.916309
0.507872
1.23464
0.78727
1.80505
0.731032
2.20181
1.92569
0.650692
0.866436
1.11697
1.38759
1.27802
1.38247
0.531295
1.10566
2.56723
0.915814
0.910314
0.945787
0.561391
1.42134
0.907533
1.36782
0.809147
1.43586

## Sheet: Figure 3 - Figure Supplement H
Control	Sema3A 700 ng/ml
0.318888	0.698148
0.190146	1.44248
0.34314	2.09857
1.36147	0.667704
1.05058	1.51962
0.509808	1.30032
0.417444	0.67983
0.800832	1.0916
1.98892	0.617652
0.870492	0.77658
0.473688	0.738138
1.18964	0.481686
1.37875	0.509808
1.03897	0.466464
0.51987	0.722916
0.842628	0.425184
1.68706	0.8643
0.866622	0.45408
1.20383	1.42674
0.5289	1.64656
1.06709	0.48891
0.314502	0.674928
0.344172	0.538446
1.40558	0.86301
0.288444	2.54517
0.601914	0.444276
1.31967	0.392418
2.00285	3.05266
0.408414	1.49408
0.745104	1.55832
0.743814	0.63339
0.3225	1.61534
2.36715	1.23401
0.53277	0.973434
2.34367	1.36585
1.12024	0.672606
2.10605	0.743298
2.00982	0.652998
1.36663	1.82174
2.26277	1.25981
1.92932	0.38829
1.39016	0.484524
0.98783	0.803928
1.0683	2.05162
0.784316	0.719046
1.43682	0.291024
0.879185	0.66951
0.408596	1.34134
2.56178	0.437826
1.1472	0.627972
1.72487	0.262386
1.30124	0.530448
0.586123	0.364038
0.663772	0.522708
0.453995	0.40248
0.797779	0.322758
1.83852	0.798768
0.56859	1.64217
0.626826	0.543606
0.504091	2.08877
0.938048	0.582564
0.930846	0.319662
0.39388	2.072
0.387931	0.998202
0.502525	1.79026
1.21295	0.480654
1.91429	0.333078
0.951198	0.277092
2.24305	0.363006
0.572034	1.32689
0.466832	0.444018
0.9656	0.21285
1.07049	0.231684
0.733906	0.753876
1.70984	1.11871
0.984386	0.376033
1.00223	0.913626
1.24896	0.913939
0.698526	0.668155
0.542602	1.76213
0.658762	1.6325
0.212908	1.19636
0.57673	1.13092
0.557318	1.05139
1.11276	0.919262
0.486557	0.309656
0.911064	0.689133
0.254694	0.437401
1.75294	0.932099
0.302566	0.449612
0.209066	0.719817
1.16277	1.23236
0.167178	0.776801
1.58613	0.538532
1.58464	0.583932
0.434962	0.7242
0.718454	0.161873
1.42756	0.967166
2.71599	0.919262
0.184382	0.767721
0.394196	0.342844
0.580074	0.79997
1.46683	0.525069
1.8973	0.854137
1.71255	0.435835
2.01025	0.601152
0.976514	0.138754
0.242352	0.19261
0.212432	1.64074
0.0748	2.95497
1.18595	0.338096
0.82467	0.261426
1.34191	1.68936
1.46982	0.787644
2.69205	0.525096
1.1048	4.39525
0.354178	1.04084
0.81719	1.18446
0.11033
1.01055
0.29172
0.365024
0.160446
3.30242
