# Supplementary material for: Receptor-specific interactome as a hub for rapid cue-induced selective translation in axons
Source: eLife. 2019 Nov 20;8:e48718. doi: 10.7554/eLife.48718 (PMC6894925; doi:10.7554/eLife.48718)
Supplement: Figure 3—source data 1. [file elife-48718-fig3-data1.xlsx]

## Sheet: Figure 3E
PLA counts				Relative comparison
Nrp1-RPS23	DCC-RPL5	EphB2-RPL5		EphB2 to Nrp1	EphB2 to DCC
2	12	1		46.5753	13.6682
0	16	0		0	0
1	7	0		0	0
3	4	0		0	0
11	6	3		139.726	41.0047
2	3	0		0	0
0	13	0		0	0
2	10	5		232.877	68.3411
2	6	3		139.726	41.0047
1	7	1		46.5753	13.6682
7	19	1		46.5753	13.6682
3	9	1		46.5753	13.6682
7	13	1		46.5753	13.6682
1	18	1		46.5753	13.6682
0	6	0		0	0
3	2	0		0	0
10	9	0		0	0
1	15	0		0	0
3	5	0		0	0
3	12	0		0	0
1	4	0		0	0
0	23	0		0	0
1	13	0		0	0
5	11	0		0	0
2	10	0		0	0
4	11	0		0	0
2	7	0		0	0
1	1	2		93.1507	27.3364
4	22	0		0	0
3	6	0		0	0
0	7	5		232.877	68.3411
0	5	0		0	0
0	3	1		46.5753	13.6682
1	8	0		0	0
1	5	0		0	0
3	6	0		0	0
1	13	0		0	0
3	6	0		0	0
1	5	0		0	0
1	3	0		0	0
3	1	0		0	0
1	10	0		0	0
4	7	0		0	0
4	7	0		0	0
0	2	0		0	0
1	5	1		46.5753	13.6682
6	7	2		93.1507	27.3364
3	4	0		0	0
3	8	0		0	0
2	12	2		93.1507	27.3364
2	9	1		46.5753	13.6682
2	15	0		0	0
0	18	0		0	0
3	12	2		93.1507	27.3364
1	7	0		0	0
1	4	0		0	0
0	19	0		0	0
1	11	0		0	0
3	2	2		93.1507	27.3364
2	6	0		0	0
1	11	0		0	0
0	6	0		0	0
1	4	0		0	0
0	3	1		46.5753	13.6682
1	5	1		46.5753	13.6682
0	8	0		0	0
0	5	0		0	0
0	3	0		0	0
0	10	1		46.5753	13.6682
0	13	1		46.5753	13.6682
3	5	0		0	0
3	8	0		0	0
1	15	0		0	0
1	4	0		0	0
1	8	0		0	0
1	9	4		186.301	54.6729
0	5	2		93.1507	27.3364
4	9	0		0	0
0	6	3		139.726	41.0047
0	8	0		0	0
6	11	3		139.726	41.0047
0	11	0		0	0
0	5	1		46.5753	13.6682
0	2	0		0	0
1	6	5		232.877	68.3411
0	4	0		0	0
3	0	0		0	0
1	9	0		0	0
3	3	0		0	0
1	8	1		46.5753	13.6682
5	4	0		0	0
1	3	2		93.1507	27.3364
0	3	0		0	0
10	7	0		0	0
1	3	0		0	0
1	9	0		0	0
2	7	0		0	0
4	9	0		0	0
3	2	0		0	0
7	7	0		0	0
3	6	0		0	0
2	0	0		0	0
1	3	0		0	0
1	6	0		0	0
0	8	3		139.726	41.0047
13	0	0		0	0
2	5	0		0	0
0	8	0		0	0
3	0	0		0	0
2	1	0		0	0
3	4	0		0	0
2	6	0		0	0
6	9	0		0	0
1	3	0		0	0
1	6	0		0	0
3	2	0		0	0
0	4	0		0	0
0
0
1
1
4
2
6
5
1
0
5
9
2
3
1
0
1
2
2

## Sheet: Figure 3G
Distance in nm	Closest ribosome GC	Closest ribosome polysome
1	0	0
2	0	0
3	0	0
4	0	0
5	0	0
6	0	0
7	0	0
8	0	0
9	0	0
10	0	0
11	0	0
12	0	0
13	0	0
14	0	0
15	0	0
16	0.0107527	0.0253165
17	0.0107527	0.0189873
18	0	0.0253165
19	0	0.0379747
20	0	0.0949367
21	0	0.107595
22	0	0.132911
23	0	0.113924
24	0.0215054	0.132911
25	0.0107527	0.120253
26	0.0107527	0.0696202
27	0.0645161	0.0506329
28	0.0107527	0.0189873
29	0.0322581	0.0316456
30	0.0322581	0
31	0.0107527	0.0126582
32	0.0215054	0.00632911
33	0.0537634
34	0
35	0.0645161
36	0.0322581
37	0.0322581
38	0
39	0.0537634
40	0
41	0.0107527
42	0.0215054
43	0.0107527
44	0.0107527
45	0.0215054
46	0.0107527
47	0
48	0.0215054
49	0.0107527
50	0.0107527
51	0
52	0
53	0
54	0
55	0.0107527
56	0
57	0
58	0.0107527
59	0
60	0
61	0.0322581
62	0.0322581
63	0
64	0.0215054
65	0.0107527
66	0
67	0.0107527
68	0
69	0.0107527
70	0
71	0
72	0
73	0
74	0
75	0
76	0.0107527
77	0.0107527
78	0.0107527
79	0.0107527
80	0.0322581
81	0
82	0.0107527
83	0
84	0
85	0.0215054
86	0
87	0.0107527
88	0.0107527
89	0
90	0
91	0.0107527
92	0.0107527
93	0
94	0
95	0.0107527
96	0
97	0
98	0.0107527
99	0
100	0
100	0.0860215

## Sheet: Figure 3H
DCC-RPL5 PLA			DCC-RPS4X PLA
Control	Netrin 2 min 60ng/ul		Control	Netrin 2 min 60ng/ul
163.924	0		67.1151	0
149.894	12.7787		40.0284	65.7501
135.234	9.26933		77.5386	98.0585
139.271	4.71907		0	96.1313
117.743	6.07562		192.373	29.9327
123.187	26.2091		122.969	122.292
158.727	5.63744		40.5636	137.515
212.12	0		172.988	26.2942
213.045	21.2626		88.2685	44.9901
193.902	0		146.561	19.9064
212.04	11.9263		123.77	0
187.594	6.06943		333.563	109.559
202.244	8.75532		64.7523	74.0219
148.279	0		136.135	95.3566
82.0208	4.4174		135.744	81.3409
150.918	13.2743		54.0292	159.897
152.267	19.2575		62.5061	0
129.647	0		44.659	22.2413
172.759	14.1446		108.654	77.5556
243.77	19.9337		32.5245	96.5713
245.838	18.5531		103.915	41.9986
199.49	5.7008		82.918	80.2922
136.525	0		69.9905	144.739
224.566	12.3187		135.348	159.412
158.248	10.0991		30.983	14.9323
26.2332	7.38904		178.737	116.954
24.6119	0		15.7681	140.01
6.70625	6.34822		41.6048	64.4887
10.6463	6.14135		16.9034	73.5297
8.24083	10.9916		67.2142	79.0671
6.37964	7.66336		26.1028	127.203
30.5759	9.20669		97.1142	113.516
44.3397	9.14255		137.171	202.22
52.2336	9.94192		210.473	159.835
49.3488	10.5583		80.6846	64.8546
51.4621	16.9323		260.167	51.324
27.4808	6.58584		281.203	19.8563
31.1593	10.817		89.9909	69.4182
163.924	0		100.678	104.379
149.894	0		260.512	77.5179
135.234	0		314.73	56.0624
139.271	0		107.989	202.708
117.743	0		148.764	151.886
123.187	0		169.149	61.3067
158.727	0		71.6959	145.519
212.12	14.4796		66.6371	137.628
213.045	0		78.3868	68.0993
193.902	0		125.046	183.738
212.04	8.843		55.6387	10.1659
187.594	20.2727		184.944	59.917
202.244	6.60225		144.667	101.459
148.279	15.4961		45.3352	244.052
82.0208	12.1296		14.2557	74.461
150.918	14.4009		35.9604	36.0839
152.267	0		175.3	98.4018
129.647	44.3136		100.754	95.2485
172.759	18.611		50.3303	90.8892
243.77	8.30109		44.9089	100.487
245.838	24.7782		93.154	81.8077
199.49	13.2301		84.6319	38.9633
136.525	18.3003		51.8997	66.4754
224.566	0		47.8835	73.4075
158.248	0		118.097	14.0884
26.2332	34.4221		81.5638	45.189
24.6119	7.71545		81.2092	32.595
6.70625	10.8762		35.5648	75.7904
10.6463	8.90244		72.8855	91.1226
8.24083	12.4235		174.743	23.1356
6.37964	20.2641		176.25	98.6984
26.0717	21.4459		119.095	176.714
30.4934	39.0405		71.1818	107.4
48.2215	95.2148		112.368	112.069
48.4322	22.8688		127.665	154.886
38.0929	60.6634		36.5919	119.076
7.98684	32.5693		57.4908	145.507
9.06664	70.3078		43.704	92.8014
20.244	56.3611		123.315	40.9129
13.3142	18.2095		34.3629	83.6334
39.4758	29.7823		58.7225	50.0804
55.0849	40.5455		46.6435	98.9359
43.0782	4.10128		58.4577	153.984
27.6174	33.1648		62.901	83.1128
97.0319	5.07682		180.23	128.245
26.1268	22.6767		60.2952	91.626
49.6941	10.2688		22.3589	49.413
22.1843	11.1876		155.322	31.2537
18.5387	13.51		63.4044	98.1528
114.216	15.6641		173.968	180.721
194.354	75.6848		125.231	104.303
40.4354	15.7781		65.8785	159.795
129.663	9.98355		147.769	119.588
46.5276	24.1547		96.4892	104.497
20.4232	0		86.2439	153.883
188.146	28.1406		147.659	105.842
45.5991	26.6675		136.429	78.3421
103.926	15.3514		176.338	158.59
116.225	16.9263		64.1582	46.4585
81.1645	25.4256		38.532	106.034
83.4265	26.4017		91.8927	140.607
159.204	58.2333		109.444	175.367
36.7534	33.6733		145.425	147.446
27.6735	51.2704		37.7072	122.011
17.0331	12.2229		96.3431	139.765
72.5043	7.99488		123.578	131.869
43.2681	4.72561		104.902	100.039
60.2592	28.3211		86.9301	55.0165
38.5025	49.5392		39.0034	59.6035
40.1359	0		55.973	88.6255
60.7149	49.9718		163.304	37.7988
97.6126	25.0823		92.0941	26.1814
53.8276	6.50497		103.507	47.5129
30.5389	28.2557		189.224	45.4732
41.3005	7.95486		109.311	12.3627
44.4099	19.9713		31.6699	167.277
46.3427	0		43.5868	35.2579
58.957	66.714		114.941	78.1934
50.4642	31.3942		106.701	41.311
40.3982	39.9565		56.9286	84.5443
171.801	14.4928		26.9213	81.013
63.8306	58.2112		117.15	90.6436
57.4979	93.5664		106.317	82.5557
12.1142	109.865		69.8824	71.8177
57.6559	0			112.369
97.4881	27.2599			72.8639
178.15	42.9492			35.2846
18.8837	69.5355			19.9792
27.7929	24.7375			65.016
35.7126	38.5647			28.9947
53.2159	16.076			172.203
88.9384	27.2465			89.8296
67.4102	30.1858			157.212
33.2242	8.65991			49.8201
25.0797	8.51759			62.6958
52.6169	25.46			45.9102
54.543	27.9294			71.5346
740.037	78.5896			105.431
	46.8844			43.8461
	57.9554			79.2677
	47.1886			9.01883
	53.3111			54.3229
	0			35.2402
	3.56577			202.122
	0			19.456
				46.4426
				54.1548
				37.1786
				50.5393
				87.0517
				9.75783

## Sheet: Figure 3J
Control	Sema3A
0.782036	0.437628
1.55027	1.06855
1.55664	2.26215
0.924952	0.245013
0.961912	1.46651
0.825461	1.91842
0.600712	0.536057
0.795546	1.29117
1.55355	2.24652
1.24109	1.83022
1.16186	0.310537
1.45377	0.273288
0.7472	1.14372
0.588457	2.95512
0.219055	1.1801
0.604862	0.544839
1.9327	0.838778
0.709275	1.18319
0.928716	0.53239
0.591159	0.82218
0.619626	0.859043
0.618661	0.454419
2.20946	1.43438
0.637286	0.693063
1.18203	1.23124
0.381976	1.02415
0.391818	0.212976
0.784301	2.00508
1.14699	2.91961
1.64002	1.2187
0.489706	0.12738
0.546364	0.759938
1.08355	0.619337
1.10709	2.5063
1.08648	1.28277
0.819679	1.00881
3.06698	1.37763
1.10776	0.739672
0.462973	0.496203
0.435708	0.838006
0.263074	1.07241
0.985663	1.66556
2.41009	0.54663
1.61808	1.01905
0.53333	0.615391
0.329441	0.404586
0.814226	1.77302
0.589855	4.66897
0.72352	1.50157
0.973294	1.72381
1.18516	2.58273
1.24581	1.20219
0.191653	0.802655
1.10762	0.191653
0.488509	0.218652
1.07703	0.783636
1.70519	0.748391
0.714077	0.419083
1.03248	0.285817
1.01572	1.00734
1.26709	1.26789
0.908656	1.08741
0.992712	1.09658
0.689605	0.914375
1.53921	0.300979
0.989653	0.544369
0.747726	1.66888
1.08422	1.3965
-0.199633	0.586796
0.753445	1.1587
0.387562	0.900277
1.12265	0.375858
1.064	0.74879
1.46646	2.03437
0.994973	1.03474
1.05416	1.24754
2.11962	1.63803
0.686945	0.323722
0.12768	0.393414
0.726313	0.745515
1.25831	0.626288
1.7407	1.41412
2.00258	0.535652
0.613396	0.571802
0.623105	0.0120791
1.48721	1.02229
1.11175	0.772193
0.229292	0.87656
1.59374	0.0979363
0.979146	1.24762
1.81558	1.28881
2.19131	0.489508
0.532665	0.442408
0.196574	0.631328
1.27667	0.710321
0.271389	0.76863
1.21156	1.0236
1.63294	0.681644
1.45192	0.363155
2.08638	0.894809
0.463003	1.56629
0.344037	1.64641
0.449534	1.27395
0.0981101	0.418684
0.431719	0.297024
0.0647405	0.603781
0.538606	0.29155
0.85301	1.19887
0.961114	0.61082
0.110797	0.727527
2.26939	0.731524
1.38545	0.508973
1.32331	0.218467
1.67726	1.32896
0.878038	1.51701
0.749425	0.333261
1.15429	2.53983
1.19001	0.287378
0.77089	0.90376
0.375843	0.224115
0.0205084	0.578754
0.779319	0.491506
0.497676	1.42334
1.10745	1.73896
2.37298	0.288682
0.760896	1.23676
0.003476	1.02942
2.66679	0.485423
0.951555	0.28816
0.72014	0.243841
0.866654	0.439888
0.825376
0.577798
0.401565
-0.112883
2.39392
3.59722
0.695026
1.21938
1.28647
0.662525
1.1403
1.49572
1.31862
1.62416
1.07947
0.571107
0.554856
1.10406
1.12631
1.17723
1.34243
1.09824
1.13891
0.585706
0.594744
1.5463
0.492549

## Sheet: Figure 3K
Control	Netrin-1
0.809923	3.32992
0.637377	0.599253
0.3153	0.417528
0.462995	0.670277
0.0700352	1.8589
0.779283	1.55504
6.2015	0.214483
0.803146	0.537831
1.74184	0.842682
1.74481	0.199092
2.56744	0.660534
0.269127	1.02031
0.942792	1.40452
0.956912	0.619444
0.111972	1.02356
0.442097	0.307251
1.24383	0.994472
1.48867	0.573696
0.577367	0.860614
0.171982	0.352718
0.160968	0.202763
0.475138	1.33476
0.143318	0.201492
2.30834	0.120726
2.42059	1.10884
1.76317	0.12821
1.06719	1.14386
0.958325	0.317841
0.138094	1.74735
0.419929	1.1056
0.759938	2.11405
0.677478	0.34128
0.202057	0.408633
1.30765	1.16439
0.835904	1.34347
2.77289	0.88356
0.334785	1.19584
0.424024	0.47508
1.61392	0.37037
1.12508	0.65934
0.118326	0.27491
0.0121432	1.036
0.206152	3.73256
0.744124	2.09753
0.603912	1.04451
0.490529	1.87442
0.627775	2.06312
2.04034	0.26455
0.218013	2.03722
0.469208	1.75713
1.76867	0.27417
2.33615	3.37736
1.10122	0.16872
1.0878	1.78303
0.37925	0.30932
0.44289	0.51726
0.68524	1.29426
0.32301	0.2405
0.40811	0.32486
0.78588	0.75258
0.2701	0.21275
0.90132	0.09028
1.35975	0.19425
3.4595	0.36075
0.93166	3.54793
0.40441	0.69893
0.37259	0.21941
0.23976	1.83483
1.8574	0.29526
0.95275	0.48988
1.86665	0.43105
0.40626	0.46065
1.57805	0.1998
0.07141	0.25197
1.37381	2.12787
0.04588	3.24268
1.54623	3.46986
1.55844	1.06671
0.43882	0.6253
1.93214	0.86876
0.89281	1.12924
1.18474	0.47323
0.37259	0.33781
1.7316	2.03796
0.20942	0.87098
2.02168	0.32819
1.23543	0.07141
1.41377	1.01158
1.62245	0.72964
1.13701	5.59403
0.91057	1.45817
1.21619	3.95456
0.17723	2.08902
0.70707	0.51874
0.66822	0.28712
1.13812	0.93018
0.47064	1.84186
1.09483	0.65786
0.76072	1.18437
0.35705	0.21941
0.2997	0.15725
0.46176	0.32042
1.43597	1.43634
0.17353	0.2257
0.79291	3.50464
1.03674	0.7918
1.88071	1.7797
0.43734	0.34077
0.21867	0.8399
0.81363	1.9869
2.2977	0.8325
2.18485	1.8796
1.3875	3.8443
0.36297	0.74851
0.40182	0.74259
0.40885	1.94583
1.19547	4.58985
3.55163	0.074
0.34077	1.45373
1.25356	0.15503
0.81992	0.2701
0.48655	0.15281
0.81141	0.55759
2.14933	0.76849
0.78255	1.28501
2.11196	0.33078
1.28575	1.14848
0.32449	2.21482
0.43993	0.47286
0.90576	1.45854
4.08739	0.63862
0.32153	1.10778
0.33263	0.98235
0.23717	0.962
1.29907	0.15762
1.5355	0.19906
0.07696	0.54427
4.2412	0.64935
0.488467	0.18056
1.16289	0.62419
1.74795	0.98827
3.02915	-0.0333
1.53529	0.95386
0.329222	0.4588
0.285792	0.27232
0.167981	0.74148
1.09649	0.288038
1.72524	0.34295
0.256838	0.34969
0.189197	0.322234
0.793978	5.0232
0.753043	3.25753
0.891821	1.47838
0.369408	3.05835
0.809702	2.06819
3.20836	1.11496
0.856877	1.30216
0.416582	1.58421
0.478234	0.401107
1.58621	1.32538
1.15091	4.1189
1.32213	0.373651
1.4664	-0.328224
1.28145	0.36192
1.29268	4.81653
0.163488	0.182707
0.225389	1.79363
0.307757	0.170227
0.250848	0.852384
0.543878	0.914534
0.190944	1.0613
0.980678	0.277805
3.58925	0.295277
0.451526	0.16199
0.59904	0.94873
2.32677	1.05855
0.645216	0.281299
0.191443	1.14616
2.08491	1.45292
0.23113	0.23088
2.38568	0.213158
1.03784	0.242611
0.149261	0.365414
1.73771
0.62999
0.23113
2.21021
3.69458
0.269318
0.988915
-0.0244608
0.159494
1.14791
1.55052
0.23063
0.239366
0.489466
0.271066
0.751046
0.482726
0.381638
0.210662
1.71625
0.400358
0.931757

## Sheet: Figure 3L
Control	Dynasore	Netrin-1	Netrin-1 + Dynasore
1.13942	3.35163	1.17146	0.818246
1.4769	0.71214	1.5893	0.497926
2.07536	1.10725	0.66066	0.490347
0.286715	1.46861	0.387387	1.9581
0.672672	0.824395	1.20449	1.21922
1.51008	1.14901	0.289432	2.26169
0.097097	2.12827	0.727584	1.16474
0.741312	2.69226	0.204776	1.77077
1.30387	3.02931	0.285714	0.656227
1.03003	1.43	0.39754	0.736879
2.26183	0.793507	1.43071	0.656799
0.609752	0.964106	1.68826	0.711282
0.082082	0.529529	1.02531	0.327899
1.25053	1.23023	0.630058	0.336622
0.672815	2.42471	1.0685	0.611182
2.03675	0.45617	0.435435	0.569998
2.02073	1.26641	0.118118	2.90819
0.090376	0.797511	0.363363	0.280995
1.02903	1.5321	0.536393	1.73202
0.515229	2.1327	1.2052	1.13642
1.06807	0.86942	0.864292	0.959101
1.29058	0.829055	0.077649	0.403689
0.830687	0.159747	0.093379	1.01601
0.319033	0.0988743	0.060489	0.887887
0.356642	0.11164	0.719576	0.456885
0.659087	0.0784848	-0.010868	1.96682
1.17946	0.282616	0.224081	0.230945
0.648934	0.710914	0.568897	0.884018
1.79208	0.467836	0.257617	0.165125
0.0773619	0.525222	0.347922	0.525399
0.0735795	0.609321	0.302828	0.16483
0.72167	0.673799	0.341007	0.83071
0.429125	0.26329	0.74531	0.234745
1.91366	0.913568	0.3533	0.341066
0.799918	0.151887	0.146864	0.281552
0.366893	0.282793	0.412518	0.238823
0.735499	0.36512	0.963153	0.512574
0.592418	0.160279	0.214415	0.270737
0.737627	0.272865	0.35194	0.0711564
0.791704	0.770132	0.481724	1.41379
1.48323	0.0768891	0.739046	0.662452
1.02621	0.333797	0.258031	0.273633
1.0391	0.369257	0.568719	0.927043
1.04477	0.425993	0.654001	0.342662
0.716528	0.196094	0.174404	1.63759
0.692534	0.348099	0.925447	1.18405
0.574452	0.0947964	0.650632	1.11759
1.45085	0.17925	0.293904	1.44911
0.919832	0.599806	1.26947	0.437472
1.10742	0.118555	0.15041	3.02401
0.7368	0.506118	0.319317	0.708883
0.23906	1.03386	0.399043	1.03287
0.805769	0.87792	1.65131	1.43661
0.776574	1.87091	0.157738	2.44588
1.20174	0.854906	0.0900093	2.05205
1.52839	1.37789	0.534559	2.00503
1.60326	2.27862	0.31193	0.584486
1.22503	0.74777	0.268018	3.0506
0.776633	1.6993	0.347331	0.627936
1.68352	1.10449	0.325996	0.63488
1.32165	0.722771	0.112526	1.34595
0.586154	1.05271	0.0771255	0.937638
0.439763	0.696186	0.418073	2.26017
1.01002	0.522387	0.210278	1.19655
0.489821	2.74625	0.0732249	1.98063
1.56739	2.18181	0.355841	2.19252
2.44325	1.39872	0.685087	1.12215
0.705595		0.656365	0.910061
1.17101		0.495376	2.29648
1.39618		0.532314	2.98096
0.814871		0.107326	2.17645
0.454479		1.47975	1.02176
0.886736		0.703054
0.869775		0.801632
4.15355		0.270264
0.399871		0.270264
0.769955		0.611212
0.734022		0.844775
0.332437		0.910495
1.69948		0.382613
0.838156		0.276056
0.431666		0.0829173
0.0808488		0.118436
0.453829		0.305429
0.3835		0.525694
1.35723		0.138944
0.927634		0.615999
0.296209		0.550044
1.2375		0.407435
1.54275		1.73784
1.99983		0.40553
1.75042		0.443027
0.156851		0.429536
1.3713		0.1984
0.35064		1.51558
3.75894		0.641229
1.56142		0.241453
1.00706		1.10945
0.531545		0.879904
0.128306		0.133722
0.105494		1.5872
1.27638		0.260301
0.388169		-0.0323392
0.163589		0.169434
1.1206		0.475763
1.19938		0.983866
0.322745		1.03466
3.83104		0.964224
2.13534		2.12248
1.17804		1.0668
0.587395		2.66134
0.774033		2.80062
0.621377		1.45011
0.350573		1.7114
0.329741		1.40546
1.43582		2.12546
0.56167		2.35778
1.34475		0.108326
4.05907		0.307718
4.40051		2.32485
0.358707		1.50863
0.281133		1.13009
0.14999		1.59057
1.52788		2.36572
1.74096		0.216653
0.410291		0.45632
0.235501		0.732691
1.1039		-0.116064
0.324781		0.348589
0.351565		1.30369
0.314662		0.465446
0.496992		0.766618
0.330931		0.759078
1.37571		0.902918
0.548179		0.52199
1.60982		0.0898752
2.58436		0.604922
0.250579		0.719795
0.228954		0.0910656
0.190266		2.27188
1.00629		2.39211
0.217446		1.79949
1.87389
