# Supplementary material for: Receptor-specific interactome as a hub for rapid cue-induced selective translation in axons
Source: eLife. 2019 Nov 20;8:e48718. doi: 10.7554/eLife.48718 (PMC6894925; doi:10.7554/eLife.48718)
Supplement: Figure 4—figure supplement 1—source data 1. [file elife-48718-fig4-figsupp1-data1.xlsx]

## Sheet: Figure 4 - Figure Supplement 1A
Control	Sema3A	EphrinA1	Sema3A + EphrinA1
0.769621	0.223196	1.00281	0.324299
0.097461	-0.0829668	0.115811	-0.0262752
0.960259	0.266393	1.37916	0.145656
2.29422	0.165291	0.77112	0.158008
3.37465	0.0913206	0.124879	0.449392
1.54096	0.0352716	0.553136	0.0972468
0.152011	0.197064	0.0763266	0.670946
1.38502	0.373922	0.361784	0.911278
0.994174	0.377063	0.0938196	0.081396
0.222411	0.090678	0.689724	0.578768
0.63239	1.69047	0.105601	0.074613
2.30394	0.154938	1.50711	0.471526
1.55017	0.396627	0.611398	0.187068
3.24484	0.197707	1.48812	0.0768264
0.0437682	0.769264	1.47691	0.046053
1.99092	0.0677586	0.137302	0.043197
0.923773	0.63953	2.42232	0.816887
0.811604	0.363783	0.297381	0.589693
1.65141	1.21708	0.0511224	0.124093
1.05836	0.209916	0.771406	0.084609
0.399483	0.0772548	0.276746	0.0436254
0.197278	0.0376992	0.428471	0.125164
0.387845	0.094248	0.0397698	0.0921774
1.3873	0.0325584	0.253327	0.605258
1.55309	0.120809	1.45649	0.188353
1.91659	0.0424116	1.03758	0.0848946
0.56406	0.0369852	2.32207	0.117453
0.484735	0.351859	1.74916	-0.0224196
1.25093	0.106315	0.301879	0.157865
1.43207	0.102887	0.0359856	1.11363
0.055335	0.931127	0.389201	0.778331
-0.0020706	0.556777	0.16829	0.007854
0.296239	0.0177786	0.017493	1.83784
0.470312	0.200777	0.277889	0.384989
0.674659	0.281602	0.079254	0.167076
0.761909	0.07854	0.0537642	0.0858942
1.0725	0.632747	0.192066	0.905138
0.426901	0.875721	0.697007	0.0204918
0.445393	0.102388	0.186711	0.490589
1.17489	0.108242	1.59301	0.0488376
0.537928	0.913706	3.31489	-0.25247
0.781973	0.103673	0.184569	0.173359
0.0694008	0.16829	0.243545	0.193922
0.391986	0.0623322	0.450962	-0.05355
2.28509	0.0598332	0.445108	1.6482
1.27567	0.152368	0.114954	0.134089
0.615545	0.657951	0.0281316	0.520006
2.0221	0.347361	0.208916	0.157508
0.952152	0.538142	0.561347	1.12319
0.043763	0.0574056	0.308519	0.26725
0.321065	0.0768978	0.265679	0.347575
2.51249	0.152582	-0.019278	0.0566916
1.56115	0.103387	0.0491232	0.064617
1.20696	0.274604	0.148798	0.091749
0.435176	0.950191	0.0308448	0.0868938
0.961968	0.0541926	0.442966	0.227623
2.28263	0.289955	0.305735	0.193208
2.25563	0.217056	0.481022	1.1399
1.02904	0.0421974	1.40829	0.500228
0.553377	0.357143	0.599189	-0.0029988
0.515749	0.0823956	0.439253	0.138944
0.174643	0.1076	0.281102	0.371781
0.573009	0.131162	0.630533	0.353785
0.286709	0.59312	0.778046	2.8949
-0.101432	0.349717	0.465956	0.39673
0.503479	0.209408	0.571557	0.329654
1.56565	1.18774	0.395056	0.975465
0.158283	0.277711	1.31526	0.559103
0.257261	0.116565	0.872865	0.655627
1.16483	1.06095	0.626606	1.57056
1.61514	1.34111	0.35393	0.488346
0.726384	0.213089	0.139587	0.21677
0.476894	0.406137	0.376706	0.459716
0.341924	0.19632	1.01923	0.293253
3.63274	0.766057	0.679942	0.919841
0.629042	1.47158	1.01081	0.139469
0.350104	5.80903	0.90678	0.427405
4.11699	0.64213	0.61047	0.247036
0.453581	0.386505	0.140015	0.502661
0.467487	-0.333335	0.196564	0.339879
0.423315	-0.51125	0.266036	2.60983
0.795914	0.375053	0.352216	0.766057
0.262169	0.373417	0.332938	1.8405
1.57261	0.349286	0.608542	1.23641
0.644183	0.340288	0.873365	0.179551
1.02567	0.925158	0.328083	0.503479
0.146645	1.26463	0.110884	0.500207
1.34302	0.311658	0.145299	1.60737
0.743142	0.210226	0.473453	1.79101
0.094317	0.318202	0.131519	0.626997
0.977563	0.391004	0.329582	0.229449
1.46898	0.818	1.03009	1.04172
0.96849	0.550514	1.30933	0.14315
0.670769	0.335789	0.125093	0.586915
2.37713	0.33947	0.127949	0.668715
0.395625	0.817591	0.47738	0.223723
1.97812	0.397548	1.0463	0.084254
2.05409	0.221269	0.415191	0.186504
0.567168	0.261351	0.283886	0.74847
0.222605	0.22904	0.544139	2.20901
0.343297	0.181187	0.217342	0.197285
0.098748	0.080573	0.174216	0.482135
4.60444	0.489982	0.340007	0.304262
2.38346	0.342742	0.402268	0.213532
0.09706	0.381597	0.24326	1.08707
1.07652	0.331903	0.381205	3.046
1.13581	0.52539	0.070329	0.494162
1.32191	0.650091	0.292954	1.64981
0.682796	0.647559	0.068544	0.275777
2.14524	0.362709	0.083538	1.46772
1.02905	0.057814	0.0847518	0.476016
0.163314	0.509143	0.287956	0.193276
0.594598	0.10761	0.164006	0.416092
0.164158	0.62667	0.0794682	0.705584
0.031439	0.721198	0.260396	0.185469
0.03587	0.781122	0.326369	0.263328
0.619285	0.072162	0.0981036	0.162048
0.756013	0.121536	0.266179	0.82712
1.96947	0.085033	0.418047	0.357856
1.17337	0.492052	0.840092	0.249191
1.8933	0.996764	0.419634	0.231467
0.767618	0.479814	2.03518	0.132508
0.285905	0.266493	0.618817	0.152764
0.05697	0.466521	0.048671	0.068997
1.70467	1.16198	0.058487	1.42341
1.39555	0.6541	0.480166	0.263539
0.794415	0.085244	5.85156	0.444366
1.06049	0.176818	2.69899	1.12357
0.971022	0.142636	14.4283	0.112252
0.056126	0.121114	1.91371	-0.496694
0.721831	0.580883	1.09039	0.438458
1.67998	0.113518	0.194684	0.242017
1.46202	1.29491	1.60819	0.222605
	0.363764	2.23314	1.11113
	0.722042	1.19101	0.067309
	0.380855	3.79634	0.017724
	0.186735	0.553453	0.081657
	0.323463	0.448164	0.522647
	0.053383	0.127444	0.303418
	1.23794	0.017935	1.3082
	0.234843	0.59291	0.465677
	0.067098	0.684273	2.63455
	0.125334	0.211211	0.264594
	0.575397	1.44472	0.17302
	0.657054	0.659797	1.68821
	0.235054	0.595653	0.410184
	0.306583	0.437192	0.722464
	0.25109	0.119215	0.230412
	0.081235	0.473484	0.533408
	0.313124	0.166057	0.85033
	0.118371	0.172176	0.074272
	0.327894	0.063089	0.257209
	0.515684	0.129976	0.309537
	0.316078	0.107399	0.201505
	0.069841	1.1394	0.240751
	0.235687	1.08454	0.381488
	0.123224	0.146434	0.29329
	0.631523	1.56689	0.089042
	0.119215	0.065199	0.585736
	0.008862	0.551554	0.188001
	0.167534	0.121114	0.084189
	0.090519	0.144957	1.5633
	0.531509	0.116472
	-0.066887	0.429174
	0.140104	0.155507
	0.094317	0.627303
	0.070896	0.108243
	0.22366	0.087987
	0.562737	0.177029
	0.442256	0.173442
	0.182937	0.866999
	0.271557	1.1624
	0.070896	0.43255
	0.3587	1.27528
	0.102757	0.160782
	1.07631	0.206991
	1.25798	0.177873
	0.742298	0.339499
	0.264383	0.07807
	1.25946	0.213532
	1.04424	0.531931
	0.172809	0.551343
	0.076382	0.028696
	0.278309	0.074905
	0.33338	0.144324
	0.588057	0.648614
	0.610212	0.406386
	0.170488	0.150232
	1.6439	0.821845
	0.069419	0.239907
	0.062034	3.00464
	0.09284	0.427697
	0.650302	0.699043
		0.162048

## Sheet: Figure 4 - Figure Supplement 1B
Control	Netrin-1	EphrinA1	Netrin-1 + EphrinA1
104.103	44.7329	19.2217	53.7467
88.7499	38.1357	16.3869	94.0911
102.169	43.902	18.8646	61.8508
63.3161	27.2068	11.6907	58.8386
86.8292	37.3104	16.0322	52.0107
85.7721	36.8562	15.837	48.5216
70.2729	30.1962	12.9752	55.053
204.029	87.6712	37.6722	66.5044
172.945	74.3142	31.9327	42.321
97.9326	42.0815	18.0824	23.8268
46.1969	19.8507	8.52983	48.4141
126.572	54.3878	23.3704	48.0747
159.612	68.5848	29.4708	56.0671
63.5137	27.2918	11.7272	64.6481
147.455	63.3613	27.2263	63.879
86.9108	37.3455	16.0473	41.0362
83.0092	35.6689	15.3269	29.6965
212.959	91.508	39.3208	29.6062
98.8693	42.484	18.2553	80.4825
126.778	54.4764	23.4084	72.9886
76.2285	32.7553	14.0749	49.8579
88.7327	38.1283	16.3837	29.9672
146.944	63.1416	27.1319	45.1012
70.926	30.4768	13.0958	31.5313
56.9093	24.4538	10.5078	25.7475
60.6777	26.0731	11.2036	40.5034
115.946	49.8216	21.4083	86.6401
124.445	53.4738	22.9776	30.8008
92.7848	39.8695	17.1319	52.883
70.0151	30.0854	12.9276	61.0129
117.132	50.3312	21.6273	104.679
107.201	46.0642	19.7937	65.5118
72.9284	31.3372	13.4656	95.797
35.0935	15.0796	6.47969	83.1982
84.1865	36.1748	15.5443	97.3912
42.1019	18.0911	7.77372	47.5848
90.4945	38.8854	16.709	91.2937
56.9436	24.4686	10.5141	58.8945
128.875	55.3775	23.7956	40.6925
115.688	49.7108	21.3607	63.1528
39.8202	17.1107	7.35243	88.4792
76.1168	32.7073	14.0543	87.2331
85.5916	36.7786	15.8037	105.044
228.896	98.3563	42.2636	43.2148
84.569	36.3392	15.6149	96.7423
102.758	44.155	18.9733	108.572
113.493	48.7676	20.9554	103.441
70.7456	30.3993	13.0625	97.0732
59.802	25.6968	11.0419	54.1463
167.309	71.8924	30.8921	58.4562
79.7205	123.329	39.0947	50.31
86.455	77.1222	67.0668	58.0388
145.879	104.962	149.71	53.2597
50.1244	45.8557	191.271	59.7026
121.321	87.5951	68.7637	93.7861
107.693	44.1787	190.575	39.7907
58.4365	54.6119	66.1322	56.1696
64.3425	139.821	80.8142	68.2069
70.2352	59.7622	35.3562	73.9736
87.2836	165.619	152.846	80.9468
96.928	90.0609	93.1233	113.864
74.4111	47.5791	98.1476	129.229
36.9205	125.795	73.7814	96.9346
75.5446	144.832	115.66	72.3298
100.885	80.8142	123.197	64.1503
128.924	60.3787	94.2103	100.262
133.517	136.427	91.9633	63.1494
104.743	82.3586	68.5317	62.7583
90.684	54.6782	105.711	49.0838
105.591	78.6202	81.2451	52.1925
121.699	93.5077	93.289	82.4249
84.2014	54.6517	72.5419	87.7608
111.888	73.2843	97.4053	104.591
108.495	107.633	96.8949	48.5203
108.694	23.2129	76.0086	35.8268
92.0031	44.3643	72.3232	48.3878
96.7225	94.2302	140.769	28.0583
79.1306	73.6091	51.6424	160.031
74.3912	80.443	85.5734	81.9808
82.5708	100.143	109.144	45.8756
134.551	111.842	74.2322	78.9715
42.3426	215.041	59.9279	83.5717
125.974	175.727	61.1012	64.939
141.862	48.5203	80.7678	67.5904
178.611	51.8346	27.0044	121.984
104.113	69.9303	90.8298	133.941
161.198	91.7711	107.779	134.021
102.821	41.8786	71.7664	104.345
74.7956	54.7776	136.659	176.191
142.949	76.8504	108.137	90.8895
	182.932	105.326	82.246
		94.5683	91.1281
		118.212

## Sheet: Figure 4 - Figure Supplement 1D
Control	Netrin-1	EphrinA1	Netrin-1 + EphrinA1
93.2797	93.2862	131.379	151.62
94.5144	114.088	156.74	177.057
106.645	91.9313	70.6909	131.328
68.3224	190.177	85.9557	95.5008
77.3	30.6576	166.312	97.3794
127.893	150.724	126.674	116.772
119.792	182.236	57.0086	237.817
74.5242	185.988	62.595	127.677
179.313	64.7696	96.4796	86.3345
223.842	87.7101	38.4289	89.6946
75.4499	204.537	63.6035	73.393
117.406	362.406	116.93	52.8999
150.169	116.04	87.7023	86.5142
149.032	236.915	46.0076	70.2759
147.856	249.12	76.9845	66.2848
55.7545	267.267	50.287	53.9846
80.1107	274.637	61.3306	194.369
73.3309	128.545	60.6803	66.9273
60.935	119.031	59.8981	98.5514
64.5059	229.903	44.0296	120.346
66.9933	75.489	26.7182	70.9172
146.388	92.9672	57.5167	153.194
161.563	174.168	103.099	129.645
160.769	160.437	100.672	85.4458
181.073	158.105	78.5661	37.029
121.635	168.113	88.6863	33.3221
43.2603	61.1477	177.094	52.9408
43.3883	133.851	75.7601	99.8389
95.303	87.0999	109.198	88.8338
112.714	265.672	104.793	99.8708
55.9316	281.054	126.429	96.7139
83.0209	171.486	133.723	151.763
50.7925	247.421	100.034	100.602
46.2766	84.4015	45.7582	112.872
65.95	150.388	81.3124	86.8251
77.3995	113.212	49.182	113.739
99.0032	149.894	27.0962	227.143
109.177	110.358	45.8219	47.0102
88.7625	93.2661	48.7396	110.055
50.64	112.45	86.0716	151.15
101.118	85.4936	147.518	115.212
110.302	358.329	124.46	64.4148
145.477	108.719	51.8088	72.8337
78.6777	84.1025	52.3588	56.9446
77.1073	150.005	86.9764	62.1007
57.385	101.876	13.1375	123.18
82.4165	235.882	66.2736	48.6502
121.502	66.6921	40.6044	26.9482
55.7309	122.973	78.028	54.1584
54.1046	90.6394	78.2751	132.363
68.5655	70.5983	218.152	115.911
115.874	193.033	158.866	114.336
75.1821	76.8721	125.428	112.576
96.2715	34.9006	52.9248	114.495
60.1951	41.0747	90.9902	121.153
40.429	301.31	54.9098
58.4453	200.104	56.3088
64.193	160.166	72.2803
96.5904	109.042	156.967
131.886	84.9874	196.468
184.224	81.6273	171.104
43.1633	118.712	127.803
164.494	237.97	88.5338
104.777	135.867	66.5742
56.9825	79.3155	56.6785
94.0035	58.0985	66.1363
56.6955	134.803	225.748
76.4616	82.5401	176.746
93.7843	87.9131	76.2296
114.818	69.3826	49.5733
74.2334	73.6156	186.105
119.083	210.34	63.0839
63.9458	66.2537	172.165
118.433	57.9949	84.9232
96.2276	61.7536	85.7819
107.261	34.1671	85.7175
188.071	80.9537	51.7284
98.117	115.42	26.5747
75.6285	87.0481	74.5338
81.9661	57.8633	87.0226
180.015	107.982	74.4179
151.409	99.7273	101.984
77.7929	139.937	141.705
108.48	206.801	111.112
164.339	109.748	44.7005
95.1674	81.4479	80.7674
81.137	114.591	65.2047
52.0838	84.7124	93.7758
34.2389	102.067	74.2161
171.406	180.777	68.1713
83.979	82.4165	47.2721
133.229	91.2931	82.8239
122.013	84.82	65.0587
171.593	106.882	79.136
142.918	100.393	101.989
165.212	218.475	128.362
79.8735	234.725	153.962
81.6751	105.17	156.941
74.5164	135.836	70.6227
63.902	170.465	58.8079
64.1053	76.1952	145.547
119.78	132.238	52.8747
136.912	158.143	90.5473
57.4209	91.3973
60.2071	96.2314
131.87	124.068
83.7876	114.052
167.994	95.8236
99.4523	115.564
104.056	86.121
135.612	214.225
69.6438	115.615
74.3921	188.226
68.1198	62.0578
45.8854	36.1056
130.804	62.0578
50.6165	83.1974
58.1381	151.171
98.8761	87.8254
169.125	82.7767
90.1394	100.082
90.9251	97.1459
66.1063	105.024
77.3715	90.0922
112.709	95.39
41.2445	97.6911
87.6108	213.547
63.9425	175.698
92.0585	75.7702
127.108	108.235
95.888	73.1814
78.0842	64.8655
46.611	49.9554
73.9198	148.157
105.642	175.625
67.2697	165.781
80.7889	108.029
75.8947	81.5746
78.1143	88.4394
104.693	86.4044
155.142	81.4458
84.1548	69.4807
189.342	121.055
126.846	71.4083
142.787
125.017
167.614
103.981
65.9045
125.777
108.458
149.892
269.925
106.771
127.61
78.5007
51.5996
94.643
89.006
177.51
71.6488
115.044
89.4697
108.862
119.775
65.7199
84.1376
189.81
74.8643
69.163
56.0989
70.4037
91.1784
71.1808
69.1244
52.6472
76.6031
79.8831
124.931
98.6571
169.898
129.001
159.706

## Sheet: Figure 4 - Figure Supplement 1E
Control	Sema3A	Netrin-1
2.07683	0.570502	1.45035
1.35779	0.453692	1.37537
2.10295	0.731832	2.28806
0.722084	0.608144	0.902253
0.648994	0.654438	1.25468
0.841721	0.743142	0.939702
0.465213	0.740821	0.576631
1.20603	0.67347	0.63973
0.542608	1.32339	0.883842
2.1706	0.760191	1.15294
0.708749	1.50135	2.62044
1.52334	0.692207	1.85436
0.993261	0.645998	1.07964
0.731284	0.604093	1.38603
0.316753	0.358869	1.53856
0.795217	0.499986	1.24112
0.840582	0.641313	1.17291
0.15479	0.469644	1.00675
0.403052	0.406048	1.14135
0.69419	0.433858	0.616132
1.21916	0.637347	0.491207
1.48949	0.692544	0.518377
0.771761	0.786946	0.438045
0.44403	0.45787	0.680257
0.4104	0.400562	0.85785
1.10472	0.28772	1.13181
0.444999	0.481629	1.09476
0.706135	0.920171	1.39302
2.06756	0.886242	1.29768
1.21587	0.324476	1.27382
1.05784	2.07447	1.2628
1.52703	1.0204	0.799843
1.31714	0.520917	0.902462
1.47668	1.00892	0.988418
1.17904	0.559614	0.967613
0.858249	0.355915	2.27282
0.977702	0.412041	2.19656
1.38501	0.645787	3.59962
0.884887	0.446982	1.30102
1.47807	1.04204	1.49496
0.941431	0.627019	1.00189
0.599431	1.00905	1.15552
0.708928	0.824619	0.981583
0.705318	1.15226	2.35261
1.12436	0.709422	0.862547
0.814397	0.528466	0.829132
1.02093	0.829882	1.24759
0.8474	1.08697	1.0336
1.32208	0.764427	1.2259
1.03303	1.15908	0.739885
1.05157	1.12539	0.836526
0.659072	0.987601	0.55238
0.559985	1.07743	1.25347
0.312343	2.02675	0.614016
1.82742	0.912931	1.35807
0.447174	0.703076	1.28136
1.42747	1.2555	2.03353
0.830443	0.818938	1.54435
0.258944	1.35099	1.45375
0.631426	0.394592	1.00908
2.34201	0.785878	1.15977
1.04125	0.939113	0.888428
0.519644	1.24598	2.29821
0.510003	2.00269	2.00316
2.27039	1.67729	1.0292
0.699487	1.83992	7.14914
0.822876	1.33471	1.07867
0.614168	0.837486	5.32961
1.53047	0.929542	1.64972
0.816009	0.853304	0.746015
2.46983	1.28438	2.82138
0.68674	1.47958	2.52495
1.84283	1.16817	2.31031
1.41412	0.870901	1.11913
0.878656	0.749457	0.800443
1.19379	0.536857	0.649178
0.534334	0.460788	0.718987
1.15294	0.797426	2.45879
0.674192	1.22502	1.20558
1.08492	0.940963	0.510956
0.883647	0.328995	0.680184
0.469741	0.481783	1.33263
0.398988	0.373721	1.33757
0.535574	0.90123	0.733806
1.87505	1.3989	0.566425
1.44094	2.07809	0.569978
1.17951	2.05801	0.667212
0.924918	0.252432	0.712276
1.1927	0.344801	0.606089
0.950819	0.516032	1.30557
1.14032	1.29572	0.326824
1.06372	0.386989	1.59718
1.14578	0.503525	3.18622
0.455317	0.875977	0.537971
1.21274	0.500254	0.896577
1.47191	1.265	1.37193
0.601027	0.607541	1.78837
1.00307	0.524407	1.3203
1.00828	0.83974	1.8396
0.931065	2.02805	1.21985
1.14182	0.969093	0.622797
2.03378	0.496517	0.440484
0.449536	0.372028	0.66129
0.633048	0.616438	0.85697
0.511633	0.837723	0.789572
1.09107	1.31814	0.5575
0.758256		0.50454
0.882815		0.291179
0.877358		0.702363
0.780576		1.19118
0.428146		0.695793
		1.18958
		0.598954
		0.958222
		1.03297
		0.45911
		0.795748
		0.504202
		0.482389
		0.736387
		0.659697
		5.68612
		1.13465
		3.09437
		0.850695
		1.20579
		0.410916
		0.522236
		1.32921
		0.540115
		0.468698
		0.649249
		1.12613
		0.521263
		1.96142
		0.7104
		1.56059
		0.70225
