# Supplementary material for: Receptor-specific interactome as a hub for rapid cue-induced selective translation in axons
Source: eLife. 2019 Nov 20;8:e48718. doi: 10.7554/eLife.48718 (PMC6894925; doi:10.7554/eLife.48718)
Supplement: Figure 4—source data 1. [file elife-48718-fig4-data1.xlsx]

## Sheet: Figure 4A
Baseline	Netrin-1	Ephrin	Netrin-1 + EphrinA1
65.1943	55.7299	82.0084	103.965
149.364	50.7918	29.327	151.336
132.514	36.6125	100.89	92.6611
156.653	51.8945	159.59	105.362
177.631	22.0817	72.4849	116.026
157.679	77.2707	74.5284	126.153
155.182	64.8307	128.666	208.573
167.003	0	96.4391	96.8966
165.493	0	27.4833	176.222
66.4802	209.912	35.6106	107.342
140.988	78.3848	52.4191	46.2352
90.7525	132.101	159.908	221.273
93.6458	23.2419	102.355	114.145
128.069	110.873	46.7839	182.983
162.315	84.4494	62.2791	56.7719
78.6115	188.103	127.28	49.2338
38.5955	58.9681	105.514	28.6027
75.8108	93.917	12.9288	146.215
88.5704	66.0115	110.51	163.846
0	111.534	153.311	131.731
211.806	280.879	99.8047	58.6386
52.6648	56.6478	133.308	98.7706
163.302	0	184.675	32.4153
82.7026	16.7289	67.2442	0
46.8392	18.3761	235.168	0
70.6021	48.0135	232.505	58.8105
77.5602	76.7219	90.2422	115.114
33.9157	89.1207	189.703	155.581
300.049	130.473	91.2537	81.8491
146.892	90.083	67.9683	60.2637
0	25.581	44.9946	186.493
195.432	83.0695	100.854	37.7187
45.8017	69.012	25.9113	122.601
115.69	0	178.449	15.8689
97.697	55.8518	134.75	119.982
0	139.098	49.934	25.8398
56.1197	169.715	115.41	115.667
62.0156	18.4304	204.047	82.0284
115.529	79.4004	56.045	128.372
0	117.347	104.649	110.8
84.8833	29.762	137.148	51.4744
116.246	121.33	18.8194	121.798
0	48.8273	88.9561	37.9054
22.3008	0	0	43.3455
91.5661	54.3286	44.955	22.8264
124.604	72.5473	93.0987	212.989
170.92	62.5217	69.9222	25.9233
54.3461	55.5921	97.6763	46.5609
79.3817	42.7409	122.737	68.7165
35.077	43.5246	142.525	109.504
54.659	132.664	97.09	47.1076
119.822	94.1493	69.1504	0
86.8565	130.067	68.4613	96.4943
47.7663	50.3518	106.785	96.4943
56.3895	22.6333	37.6828	185.311
94.1986	46.3688	54.7514	49.9192
32.8678	69.3742	82.9051	45.9704
147.15	46.2987	76.9527	103.49
133.348	42.7517	55.9011	27.0009
49.1992	0	61.4936	49.0123
45.5175	34.4004	44.2792	106.569
215.823	54.4867	114.754	69.7782
149.707	148.417	108.077	92.9002
65.4465	86.2032	37.3524	32.6962
165.274	91.5909	47.1912	123.361
88.2283	164.946	40.1098	150.594
26.9838	153.677	50.866	53.2671
178.477	88.9385	70.2544	164.201
151.827	118.14	105.216	15.1503
95.3713	160.669	31.0019	65.493
108.943	31.3044	59.0635	74.7309
74.3786	135.707	124.99	110.83
198.549	176.941	61.3532	84.1664
147.197	103.081	34.6906	121.462
158.021	125.787	25.9009	47.1254
116.537	70.4869	70.3472	48.3833
189.181	52.9414	115.064	87.805
130.231	32.8678	88.9654	55.7693
23.1554	38.542	141.937	126.912
118.702	239.625	172.716	158.966
120.058	76.8337	11.4396	61.0967
121.804	12.9457	48.5218	226.819
130.313	102.238	100.749	158.411
43.1315	100.902	66.4741	167.756
52.001	99.4319	124.95	80.8592
107.307	105.208	283.269	145.438
68.9489	42.3974	14.3423	43.3157
116.004	138.499	40.2462	54.5272
69.9682	148.446	70.5429	167.571
64.167	247.08	52.3043	168.783
51.346	119.822	104.36	96.9869
17.0988	78.9077	109.503
86.8114	99.5913
42.908	97.8269
78.0648	85.4325
39.4194	101.204
48.3481	17.8917
104.623	36.0304
54.3602	50.7586
95.5831	55.0344
152.84	18.9825
92.2537	18.9825
191.808	94.6592
199.174	97.9812
234.434	167.871
87.2779	84.0596
69.0607	75.687
134.191	13.2058
96.8185	101.817
30.4305	53.5887
78.4179	48.5819
125.836	57.9478
118.193	53.113
58.5762	89.9539
47.9476	36.861
62.7159	67.6566
70.7291	52.7056
121.733	35.1893
	129.853
	14.5302
	92.8551
	0
	29.8672
	28.9678
	50.9578
	39.0938
	0
	73.311
	115.085
	100.988
	68.882
	62.0761
	72.7189
	52.1123
	23.2311

## Sheet: Figure 4C
Baseline	Netrin-1	Ephrin	Netrin-1 + EphrinA1
126.802	144.206	44.1994	71.742
192.799	83.4527	65.3641	44.6046
66.4613	75.1076	70.7268	40.7909
61.1569	100.313	33.0896	20.4138
85.2481	73.7851	56.0949	31.633
81.4842	58.2751	45.017	26.7397
224.27	74.659	73.3799	18.5423
114.231	64.3415	37.9784	60.7448
73.6718	82.7425	110.068	40.9413
59.2886	69.8145	87.6704	53.852
124.353	69.6007	97.4489	54.5707
63.7351	68.2847	72.5587	37.2229
52.3945	89.9872	65.6467	108.935
120.223	81.092	39.3399	52.9839
175.706	70.6608	32.3273	49.8635
82.3988	87.9259	33.0837	63.9053
243.871	46.3203	79.0814	49.1403
104.708	68.4872	34.4648	38.507
122.952	110.38	59.7479	40.9156
62.3706	57.3045	39.6901	40.9458
54.7878	45.8145	36.5902	60.3748
41.4214	55.8961	11.5551	47.6867
56.1779	85.5664	31.9367	91.9472
73.5322	42.4603	46.8085	44.9308
51.2937	98.6812	60.0476	70.9776
69.3891	48.5232	45.4454	72.6923
63.0597	35.3556	93.4712	106.318
67.1634	70.996	75.0548	77.4977
114.857	62.1919	58.9976	73.5386
119.05	70.9586	50.9689	68.4349
142.936	66.2172	38.2524	35.0607
96.7954	71.2906	67.2829	60.3522
54.5752	57.4874	28.4563	48.4082
141.154	57.5089	64.7106	64.2776
73.954	118.461	38.7664	41.258
82.0196	100.847	87.1984	40.0107
195.008	117.752	52.0113	37.3858
200.248	91.2448	24.0219	23.7576
104.793	53.4865	30.5251	113.775
69.2631	28.5901	34.8891	50.4726
141.692	53.9962	56.6651	26.9561
109.748	87.4682	28.4483	55.9407
126.016	52.7945	64.1221	40.7417
58.1006	55.0052	55.1364	99.962
90.5929	50.6489	43.7755	62.9749
67.2155	86.1347	43.7364	52.184
102.005	41.5711	53.9701	83.8815
94.4776	74.1139	25.8278	56.3562
56.7349	71.4478	39.8818	32.062
87.7416	45.8662	30.9089	47.8116
138.137	86.4107	46.6158	52.3917
178.635	31.7775	35.2122	25.4057
112.665	67.9286	30.7679	37.591
46.7027	54.7855	30.6033	69.8195
99.1978	73.2536	32.8634	38.1811
72.4461	45.541	108.468	50.1243
50.2886	141.561	60.6936	66.816
70.0039	84.7853	18.74	43.3286
107.108	126.846	43.5776	52.7419
88.128	33.3327	12.9159	15.1848
92.7574	34.3329	74.3153	58.3202
155.203	109.389	68.0004	68.7728
88.7088	43.9136	36.0031	99.0461
41.7253	80.5757	79.4252	35.3526
55.1137	37.6591	30.3247	68.9722
39.6522	50.2681	33.8222	83.9678
69.0129	58.0736	56.7973	20.6128
41.0298	43.786	39.7537	40.4455
78.4324	51.28	77.3582	42.3328
136.404	83.0341	37.1609	37.2836
104.396	23.8682	34.6043	49.3471
109.105	72.2716	17.2733	36.0397
98.2904	56.1704	19.2318	64.3935
128.244	59.3112	45.3583	97.9005
109.06	93.3634	60.4442	42.7529
54.5609	62.6838	67.1869	86.6158
70.8254	44.956	51.8316	64.054
85.4015	49.191	22.5636	45.197
70.7392	34.8891	18.5166	38.7784
53.2669	65.9543	47.7013	101.328
115.067	101.86	35.5766	70.8899
67.5075	119.239	70.4639	50.3822
63.6857	62.8021	25.1103	44.6751
55.247	73.6387	41.8422	44.5993
34.7759	49.2093	76.2815	35.6001
66.2471	81.2194	64.6037	56.9995
64.8217	86.5458	44.0187	36.4626
46.4062	74.3748	20.8672	83.2739
69.726	54.3407	23.4136	63.1541
278.253	72.555	11.0677	32.8659
115.371	165.341	38.6671	60.4561
209.44	129.954	53.6357	30.5205
113.185	115.934	12.5537	44.0824
159.6	96.3144	31.3346	32.4321
140.348	81.1628	18.5867	48.2739
76.1661	138.097	41.2667	38.9821
140.483	60.2244	27.7473	22.6963
118.947	145.242	29.6273	67.2141
59.114	48.1786	8.51689	116.864
282.999	69.2177	36.2843	77.7654
44.5309	57.617	17.2284	72.4063
141.841	72.697	43.961	45.5047
130.692	70.0429	46.1251	35.394
70.3409	90.3504	44.3937	41.5333
122.722	51.6651	75.055	42.4609
147.959	42.7802	28.6278	37.4998
133.565	17.0053	56.8716	37.5393
158.926	49.6266	78.0226	29.676
96.2063	62.9376	55.1238	50.5545
121.283	81.1712	67.8729	38.0694
105.189	43.2658	39.5837	66.3997
124.027	57.5509	69.122	55.547
48.3775	49.4981	34.417
65.1357	46.6724	75.3634
60.0893	81.5093	123.174
131.18	36.902	31.1826
60.4661	74.7538	36.0193
74.0856	129.1	68.7957
90.4914	140.625	45.3708
99.9627	80.0857	100.054
132.65	114.882	59.4274
138.601	107.656	47.3612
56.7929	192.092	45.0347
107.353	105.748	12.0476
105.866	133.168	102.321
65.1032	117.394	118.651
86.8663	71.4525	51.5372
87.5513	71.1094	11.8226
78.163	118.369	89.7783
108.258	108.538	74.8875
126.428	83.0505	39.4649
106.879	44.7385	108.721
97.7388	53.2512	24.6018
32.8954	37.7141	52.0594
93.0724	75.0793	47.2352
95.9189	85.1444	61.8444
81.7843	63.3629	55.2517
102.736	66.253	96.8438
112.082	101.782	77.9444
129.089	66.2496	64.4166
131.839	70.1468	67.4415
112.745	99.8437	25.0442
97.9105	116.898	50.4559
100.832	36.7965	69.6225
82.6846	114.248	70.8927
92.7716	28.537	74.5368
136.183	35.7681	89.9531
178.439	56.7617	74.3788
133.776	120.647	74.0165
125.642	36.9003	114.129
94.5529	19.4145	71.1225
84.749	41.7826	40.5402
95.4747	145.493
103.111	99.7061
116.971	75.4477
130.123	44.7683
172.503	34.775
85.0135	30.5214
71.1758	55.4657
69.993	76.175
101.325	36.8273
73.7943	29.735
48.1162	33.2297
69.9781	35.934
88.7009	54.1085
88.2248	52.5057
86.9668	150.979
75.0848	92.9625
110.159	64.1785
81.9834	52.8956
53.6574	37.0985
108.743	61.6258
131.994	76.5525
86.7583	105.611
49.1407	63.622
65.0282	67.4984
73.6317
106.769
110.598
180.336
83.2487
111.273
102.532
104.031
114.913
125.452
48.508
96.0385
61.1369
97.0803
144.456
164.387

## Sheet: Figure 4F
Baseline	Netrin-1	EphrinA1	Netrin-1 + EphrinA1	Sema3a
74.6393	95.9124	105.177	92.5299	80.2173
55.7442	106.516	90.395	114.773	113.983
120.456	196.46	97.6188	101.495	96.054
112.323	216.484	76.8075	135.448	127.264
87.9321	89.8874	109.005	126.57	96.6143
107.658	130.097	113.634	59.3376	73.422
102.334	209.551	131.074	94.5428	84.4647
100.338	102.065	78.0785	87.8784	89.0928
110.828	99.782	118.143	60.8077	85.4672
167.634	88.0893	82.0808	100.979	58.6035
134.142	73.8096	89.9713	79.7233	133.035
69.8199	143.926	71.3867	93.9122	50.1741
104.592	188.416	66.4579	109.332	132.182
100.022	55.835	119.717	56.7956	127.334
76.2012	112.878	42.9474	148.35	86.4151
182.81	72.1042	94.4325	37.6926	204.454
97.4216	81.335	87.9629	115.166	82.8569
52.0923	169.653	161.758	99.1085	110.649
104.011	155.916	132.76	82.2687	116.655
102.812	127.331	107.969	58.5415	145.46
85.6742	106.657	65.7322	83.9142	87.525
38.5682	128.704	139.714	85.6695	135.045
115.048	137.373	110.485	129.111	89.5008
96.4503	108.74	82.024	98.5229	65.878
115.797	93.4778	122.294	73.9126	80.1071
98.3724	142.29	64.926	116.154	70.5479
98.8244	118.752	102.148	97.2743	79.0106
87.4567	77.2731	143.645	84.6389	72.3377
122.225	81.2862	159.092	107.442	67.3918
98.879	60.6154	112.03	47.6426	132.015
143.805	83.1312	64.7857	52.6874	120.336
111.237	134.49	73.1765	106.997	72.9494
109.379	93.2054	112.339	128.854	124.021
44.063	89.6238	165.492	98.8523	100.576
107.075	131.084	120.913	124.554	80.4679
96.1088	135.263	94.3154	61.58	101.98
138.862	155.422	101.019	107.042	64.7831
114.636	150.03	118.514	86.664	91.7554
95.7872	154.858	105.51	116.04	61.1717
90.2248	111.12	59.1744	76.6531	70.0208
51.2458	139.715	132.396	92.7391	66.4173
69.6882	71.3431	75.9426	113.606	75.6858
53.2442	114.275	83.0362	135.18	66.8651
79.1644	87.1221	157.544	70.1268	78.2563
74.9369	102.623	99.256	84.5483	74.122
75.4342	76.584	111.028	66.3785	122.17
224.004	180.799	90.714	65.0872	90.147
50.6239	134.769	76.506	149.98	77.538
108.759	195.949	61.625	161.736	48.407
91.1463	152.208	73.121	73.2571	61.839
146.831	148.115	129.112	131.1	61.689
81.8957	140.554	150.964	125.78	113.985
135.893	109.091	110.74	63.6422	102.044
29.3357	50.9854	84.022	125.133	175.5
52.1928	92.9809	138.755	102.769	114.852
86.9039	108.43	152.851	164.006	81.459
80.7731	81.5393	95.393	93.264	91.793
81.7046	71.1596	118.143	90.451	71.663
122.223	60.2858	68.675	118.48	67.976
93.9766	112.758	96.818	93.145	77.062
138.647	159.816	101.277	61.496
144.49	132.606		93.626
110.421	84.0083		83.375
64.2946	59.5047		127.979
109.476	73.6396		118.082
65.0365	206.778		70.801
152.451	177.708		99.036
132.194	130.707		115.614
120.731	168.752		101.731
124.446	151.047
88.025	122.333
57.171	110.192
72.889	99.1174
92.951	92.1135
92.093	67.6051
104.997	154.432
91.668	106.021
89.586	137.59
79.722	183.627
79.999	75.3126
101.976	144.957
65.099	92.8436
73.362	95.329
100.091	138.452
98.591	85.5082
155.718	113.179
122.766	114.227
101.561	138.4
89.27	89.7043
106.729	183.741
83.211	153.996
96.457	104.702
73.164	117.355
113.164	82.9003
118.476	147.482
79.994	170.174
82.664	85.6157
64.366	123.003
99.627	91.721
102.029	158.417
94.101	90.4223
107.932	62.545
112.615	105.381
124.815	171.85
138.722	134.468
109.017	124.045
166.831	69.729
116.259	102.09
119.714	60.939
125.666	90.913
114.877	88.396
67.592	84.594
	103.026
	126.61
	77.784
	120.213
	97.086
	81.525
	157.267
	73.885
	113.038
	86.124
	65.418
	97.857
	109.357
	119.022
	98.907
	93.476
	137.967
	172
	157.911
	128.029
	196.546
	106.661
	152.004
	102.235
	99.777
	146.66
	143.259
	169.124

## Sheet: Figure 4H
Control	Netrin-1	EphrinA1	Netrin-1 + EphrinA1	Sema3A
0.759836	2.48082	0.375661	1.88628	0.933754
0.452945	0.971989	0.118267	0.56084	0.935766
0.458014	0.775509	0.93565	0.550314	0.483402
1.49305	1.45462	0.299731	0.566181	0.837894
0.595632	1.50044	0.423262	1.06723	1.49308
0.888088	0.906083	0.541181	0.52067	1.75884
1.00136	0.642691	1.2682	1.66209	0.92106
0.512543	0.706081	0.546096	0.7752	0.826825
1.42784	1.07245	0.765563	1.35481	0.781043
0.793853	0.757049	0.54002	2.06817	0.901594
1.14405	1.27025	0.666414	0.771368	0.775471
1.00628	0.733481	0.934953	1.42559	0.570245
1.17188	0.72578	1.12512	0.91839	0.741492
1.77865	1.19312	0.528603	0.678218	0.864829
1.68163	0.485337	0.573341	0.684061	0.984064
1.15144	0.620516	0.909837	0.38967	1.454
0.601166	1.2903	0.890371	0.427829	1.01084
0.6716	2.02018	0.702134	1.01386	1.17439
0.634796	1.77463	1.62382	0.907051	1.48066
1.49734	0.769008	1.35749	0.548727	1.33217
1.3944	0.606158	1.33948	1.4889	1.03987
1.05697	1.63651	0.444854	0.577559	1.00608
1.62072	1.64935	1.27797	1.44839	0.889365
0.874078	0.93565	1.01357	0.632358	1.44926
1.35682	2.29445	0.561343	0.812429	0.489778
0.508905	1.28391	0.625711	0.69242	0.832001
0.582899	1.80753	1.21016	1.69413	0.883719
1.62931	1.09122	1.53294	0.813242	0.345486
0.658055	1.31101	0.957653	0.472211	1.10472
0.716995	1.11258	0.536981	0.894134	1.33045
0.698496	1.1445	1.66409	0.552045	0.716139
0.934218	1.75237	0.601126	0.708361	0.914204
0.874504	2.82146	1.61188	0.850105	0.61391
1.36329	1.12774	1.01465	0.88363	0.841388
0.887653	2.20907	1.31454	0.582083	0.656151
0.762001	1.39098	0.701164	1.44801	1.17749
1.00468	1.66378	0.475787	0.830258	0.820826
1.07798	1.48399	0.635187	0.758604	0.540468
0.83969	1.89246	0.963687	1.03624	0.613776
1.0125	2.01955	0.72271	0.368954	0.386744
1.68304	0.979019	0.406189	0.804019	0.676445
1.19827	0.899766	0.614983	1.13176	0.937001
1.86015	0.772416	1.15639	0.680245	0.635902
1.43603	1.1006	1.12635	0.893374	0.691017
1.4055	1.07275	1.26412	0.601438	1.77651
0.690168	2.05218	1.58198	0.590487	0.958144
0.779613	1.43487	1.51068	0.755162	0.720832
1.1706	1.60133	1.17458	1.13574	0.657626
1.842	2.02871	0.499701	0.778585	0.949428
1.24708	1.18088	0.580832	0.941382	0.706618
1.08867	1.4258	0.631164	1.23265	0.860028
0.928195	1.45561	1.26769	0.998553	0.955507
1.56781	1.82479	0.83142	1.07128	0.6317
1.18897	1.16166	0.619587	0.678904	0.700673
0.58633	1.71782	1.0779	0.780015	0.646049
1.30864	1.42799	1.07258	1.00548	0.654497
0.854977	1.53513	1.077	0.643099	0.699823
0.973521	1.50027	0.754625	0.757397	1.05827
0.805226	2.09133	1.25424	0.364976	0.872424
0.89333	1.74603	0.927756	0.654363	1.20679
0.912908	1.20998	0.412056	0.706284	1.00188
0.753821	0.823508	0.750492	0.678204	0.948024
0.55799	2.29646	0.457452	0.60822	1.10023
0.566394	0.86634	0.333936	1.07132	1.50887
1.05841	2.23585	0.72666	0.729684	1.1196
0.611764	0.97002	0.592668	1.62922	0.779652
0.582173	0.832752	0.593784	0.584388	1.08389
0.491208	1.44414	0.476532	0.490356	1.02395
0.381827	1.06254	0.609336	0.67572	0.757152
0.533196	0.98604	0.971244	0.579816	1.15589
0.720252	2.06035	0.516276	0.359172	0.983628
0.822168	0.744696	0.886536	0.677664	1.94591
0.997992	0.631764	0.407736	0.585324	0.984528
0.643392	1.58029	0.496584	0.741096	0.731304
1.05818	1.31425	0.58194		0.837108
0.948024	1.99822	0.622296		1.67911
1.5655	1.20413	0.701568		1.51333
0.829152	0.880236	1.06466		0.929736
1.81483	1.0435	0.601884		1.43255
1.52071	1.79456	0.75366		1.05016
1.39356	2.61004	0.567432		1.07251
1.75432	1.41412	0.76716		1.0868
1.33369	0.540432	0.913212		1.1241
0.859824	0.894168	0.954936		1.29607
0.993708	0.409608	0.580068		1.26007
0.721656	1.34701	0.452016		0.780552
0.456948	0.529884	0.582408		0.948132
0.91368	0.63252	0.766044		1.06679
0.62424	1.07424	0.520992		1.60913
0.876456	1.05761	0.3834		0.423
0.834408	0.653292			0.719064
0.435672	0.972324
0.931788	1.24801
1.39417	0.659448
	0.774396
	0.481536
	0.304524
	0.845748
	1.17389
	1.56438
	0.92034
	0.720468
	0.915192
